# Supplementary material for: Metatranscriptomic and Metagenomic Analysis of Biological Diversity in Subglacial Lake Vostok (Antarctica)
Source: PubMed Central journal article supplement (PMC7150893; doi:10.3390/biology9030055), 2020-03-16
Supplement: biology-09-00055-s001.pdf [file biology-09-00055-s001.pdf]

## Supplementary File S1. Python scripts.

---

- This script will demultiplex the raw FASTQ sequence files and remove the MID sequence from the sequences. A new file is then created corresponding to each of the samples.
- 

```
file1 = #input file
file2 = #MID2 – 2149m sample
file3 = #MID4 – 3501m + 3520m samples
file4 = #MID5 – 3540m + 3569m samples
file5 = #MID6 – 3585m
file6 = #MID10 – negative control

# creates empty lists for each sample
mid2 = []
mid4 = []
mid5 = []
mid6 = []
mid10 = []

# MID indexing sequences
primermid2 = ['ACGCTCGACA', 'TGTCGAGCGT']
primermid4 = ['AGCACTGTAG', 'CTACAGTGCT']
primermid5 = ['ATCAGACACG', 'CGTGTCTGAT']
primermid6 = ['ATATCGCGAG', 'CTCGCGATAT']
primerneg = ['TCTCTATGCG', 'CGCATAGAGA']

import Bio
from Bio import SeqIO
```

```

for seq_record in SeqIO.parse(file1, 'fastq'):

    if 'ACGCTCGACA' in seq_record.seq[-10:] or 'TGTCGAGCGT' in seq_record.seq[-10:]: # MID2 – 2149
        trimmed = (rec[-10:] for rec in \
            SeqIO.parse(file1, "fastq") \
            if rec.seq.startswith("ACGCTCGACA") \
            or rec.seq.startswith('TGTCGAGCGT'))
        count = SeqIO.write(trimmed, file2, "fastq")
        print("Saved %i reads" % count)
        print('2149 done')

    if 'AGCACTGTAG' in seq_record.seq[-10:] or 'CTACAGTGCT' in seq_record.seq[-10:]: # MID4 – 3501 + 3520
        trimmed = (rec[-10:] for rec in \
            SeqIO.parse(file1, "fastq") \
            if rec.seq.startswith("AGCACTGTAG") \
            or rec.seq.startswith('CTACAGTGCT'))
        count = SeqIO.write(trimmed, file3, "fastq")
        print("Saved %i reads" % count)
        print('3501+3520 done')

    if 'ATCAGACACG' in seq_record.seq[-10:] or 'CGTGTCTGAT' in seq_record.seq[-10:]: # MID5 – 3540 + 3569
        trimmed = (rec[-10:] for rec in \
            SeqIO.parse(file1, "fastq") \
            if rec.seq.startswith("AGCACTGTAG") \
            or rec.seq.startswith('CTACAGTGCT'))
        count = SeqIO.write(trimmed, file4, "fastq")
        print("Saved %i reads" % count)
        print('3540+3569 done')

    if 'ATATCGCGAG' in seq_record.seq[-10:] or 'CTCGCGATAT' in seq_record.seq[-10:]: # MID6 – 3585
        trimmed = (rec[-10:] for rec in \
            SeqIO.parse(file1, "fastq") \

```

```
        if rec.seq.startswith("ATATCGCGAG") \
        or rec.seq.startswith('CGTGTCTGAT'))
count = SeqIO.write(trimmed, file5, "fastq")
print("Saved %i reads" % count)
print('3585 done')
```

```
if 'TCTCTATGCG' in seq_record.seq[-10:] or 'CGCATAGAGA' in seq_record.seq[-10:]: # MID10 – neg control
    trimmed = (rec[-10:] for rec in \
        SeqIO.parse(file1, "fastq") \
        if rec.seq.startswith("TCTCTATGCG") \
        or rec.seq.startswith('CGCATAGAGA'))
count = SeqIO.write(trimmed, file6, "fastq")

print("Saved %i reads" % count)
print('neg control done')
```

- 
- The goal of this program is to remove duplicate GI numbers from each input file. For each GI number, the sample with the highest % identity is assumed to be the best. If the percent identity is tied for multiple samples, then the lowest e-value is the chosen sample among the tied percent identity.
- 

```
# file to have duplicates removed
file1 = # input file
f1 = open(file1,'r')

# output file
file2 = # output file
f2 = open(file2,'w')
f1.readline() # bypasses header in file
best_samp = {}

# creates dictionary for each gi number found first.
for read in f1:
    gi = read.split(',')[2]
    if gi not in best_samp:
        best_samp[gi] = read

# resets cursor to top of file and skips header
f1.seek(0)
f1.readline()

# begins 2nd read through and replaces item if better
for read2 in f1:
    gi2 = read2.split(',')[2]
```

```
pid_new = read2.split(',')[6]  
pid_new = float(pid_new)
```

```
pid_org = best_samp[gi2].split(',')[6]  
pid_org = float(pid_org)
```

```
if pid_new > pid_org:  
    best_samp[gi2] = read2  
if pid_new < pid_org:  
    pass  
if pid_new == pid_org:  
    e_val_new = read2.split(',')[7]  
    e_val_old = best_samp[gi2].split(',')[7]  
    if e_val_new < e_val_old:  
        best_samp[gi2] = read2
```

```
for key,value in best_samp.items():  
    clean_val = str(best_samp[key])  
    clean_val = clean_val.replace("\",").replace("'",").replace("[,").replace("],").replace("\n",")  
    f2.write(clean_val + ',' + '\n')
```

```
f1.close()  
f2.close()
```

- 
- This script removes the EcoRI NotI primers from the reads.  
Based upon the Biopython Cookbook script.
- 

```
import Bio
from Bio import SeqIO

file = # input file
out = #output file

trimmer = (rec[19:] for rec in \
    SeqIO.parse(file,'fasta') \
    if rec.seq.startswith('AATTCGCGGCCGCGTCGAC'))

SeqIO.write(trimmer,out,'fasta')
```

- 
- This script uses Biopython to parse a FASTA file. Then the built in Python statistics module is used to analyze the mean, median, mode, maximum, and minimum read lengths.
- 

```
from Bio import SeqIO
import statistics

file1 = # input file
print(file1.split('\n')[-1])
records = list(SeqIO.parse(file1, "fasta"))
print("Total reads: %i" % len(records))

sizes = [len(rec) for rec in records]

print("Mean read length:", statistics.mean(sizes))
print("Median:", statistics.median(sizes))
print("Mode:", statistics.mode(sizes))
print("Max:", max(sizes))
print("Min:", min(sizes))
```

- 
- This script uses Biopython to retrieve full GenBank files based upon accession numbers. The GenBank reports are then parsed to determine what the product is of the particular gene is.
- 

```
from Bio import Entrez
from Bio import SeqIO
from Bio.SeqFeature import FeatureLocation

count = 1
products = []

file1 = # input file
f1 = open(file1, 'r')

file2 = # Output file
f2 = open(file2, 'w')
f1.readline()
for read in f1:
    temp_list = []
    accession = read.split(',')[1] #retrieve accession from file
    read = read.replace('\n',")
    temp_list.append(read)

# retrieve start and end locations
hit_start = read.split(',')[4]
hit_end = read.split(',')[5]
```



```
start = str(hit_start)
end = str(hit_end)

start2 = start.replace("\",").replace("'",").replace('[,').replace(']',")
end2 = end.replace("\",").replace("'",").replace('[,').replace(']',")

start3 = float(start2)
int_1_s = int(start2)

end3 = float(end2)
int_2_e = int(end2)

# confirms start is smaller than end or rearranges
if int_1_s > int_2_e:
    int_start = int_2_e
    int_end = int_1_s
else:
    int_start = int_1_s
    int_end = int_2_e

hit_range = range(int_start, int_end)

print(accession + ' being retrieved from NCBI...')

Entrez.email = # user email

#fetch full genbank report from NCBI
handle = Entrez.efetch(db='nucleotide', id= accession, rettype='gb', retmode='text')
record = SeqIO.read(handle,'genbank') #assign handle to variable for manipulation
feature_count = len(record.features) # counts number of features on report

for i in range(1, feature_count):
```

```
feature = record.features
f = feature[i].location
range1 = list(f)
range2 = list(hit_range)
if any(elem in range2 for elem in range1):
    try:
        prod = feature[i].qualifiers['product']
        prod = str(prod)
        clean_prod = prod.replace("\",").replace("'",").replace('[,').replace(']',")
        temp_list.append(clean_prod)
        print(prod + ' found for ' + accession)
    except:
        pass
products.append(temp_list)
print(str(count) + ' retrieved so far...')
count += 1
```

```
for i in products:
    clean_products = str(i)
    clean_products = clean_products.replace("\",").replace("'",").replace('[,').replace(']',")
    clean_products += '\n'
    f2.write(clean_products)
```

```
f1.close()
f2.close()
```

- 
- This script uses Biopython to retrieve the phylum of an organism using the taxonomic ID number retrieved during initial BLAST analysis.
- 

```
from Bio import Entrez
Entrez.email = #email
file1 = #input file
file2 = #output file

def find(lst, key, value):
    for i, dic in enumerate(lst):
        if dic[key] == value:
            return i

master = [ ]

with open(file1, 'r') as f1:
    header = f1.readline()
    header = header.split(',')[13]
    header = str(header)
    header = header.replace('\n', '').replace('\r', '').replace('\"', '').replace('[', '').replace(']', '')
    master.append(header + ',' + 'phylum')

for read in f1:
    temp = [ ]
    read2 = read.split(',')[13]
```

```

read2 = str(read2)
read2 = read2.replace("\n","").replace("\","").replace("'",").replace('[,').replace(']',")
temp.append(read2)
taxid = read.split(',')[8]
handle = Entrez.efetch(db="Taxonomy", id=taxid, retmode="xml")
records = Entrez.read(handle)
taxa = records[0]["LineageEx"]
taxa = list(taxa)
index = find(taxa,'Rank','phylum')

if index != None:
    phylum = taxa[index]
    sciname = phylum['ScientificName']
    sciname = sciname.replace(',','').replace("\","").replace("'",").replace('[,').replace(']',")
    print(sciname)
    temp.append(sciname)
else:
    temp.append('none')
master.append(temp)

```

with open (file2,'w') as f2:

```

for i in master:
    item = str(i)
    item = item.replace("\","").replace("'",").replace('[,').replace(']',")
    f2.write(item + '\n')

```

**Table S1. Characteristics of organisms in basal ice.** Taxa in the basal ice sample (3,501 + 3,520 m sections), where characteristics could be determined.

| Taxonomy                          | Species/Strain/Isolate                                                                                                                                                                                                                                                                                                                                                                                                                                                                                                                                                                                        | Characteristics (habitat, habit, functions)                                                                                                                                                                                                                                                                      |
|-----------------------------------|---------------------------------------------------------------------------------------------------------------------------------------------------------------------------------------------------------------------------------------------------------------------------------------------------------------------------------------------------------------------------------------------------------------------------------------------------------------------------------------------------------------------------------------------------------------------------------------------------------------|------------------------------------------------------------------------------------------------------------------------------------------------------------------------------------------------------------------------------------------------------------------------------------------------------------------|
| <b>ARCHAEA</b><br>Euryarchaeota   | <i>Halorubrum trapanicum</i>                                                                                                                                                                                                                                                                                                                                                                                                                                                                                                                                                                                  | Halophilic                                                                                                                                                                                                                                                                                                       |
| <b>BACTERIA</b><br>Actinobacteria | <i>Actinomyces naeslundii</i><br><i>Actinomyces oris</i><br><i>Actinomyces radicidentis</i><br><i>Actinoplanes</i> sp. SE50/110<br><i>Cryobacterium</i> sp. GCJ02<br><i>Cryobacterium</i> sp. LW097<br><i>Dietzia timorensis</i><br><i>Euzebya</i> sp. DY32-46<br><i>Gordonia iterans</i><br><i>Hathewayia histolytica</i><br><i>Lysinimonas</i> sp.<br><i>Microbunatus phosphovorius</i> NM-1<br><i>Mycobacterium</i> sp. PYR15<br><i>Nakamurella panacisegetis</i><br><i>Phycococcus dokdonensis</i><br><i>Pseudolabrys taiwanensis</i><br><i>Rhodococcus jostii</i> RHA1<br><i>Stenotrophomonas</i> sp. G4 | animal associated<br>animal associated<br>animal associated<br>soil<br>soil, psychrophilic<br>soil, psychrophilic<br>soil<br>deep ocean<br>various environmental sources<br>psychrophilic<br>soil<br>sediment<br>estuary wetland, nitrogen fixation<br>soil<br>soil<br>soil<br>soil<br>marine, nitrogen fixation |

|               |                                                                                                                                                                                                                                                                                                                                                                                                                                                                                                                                                                                                                                                                                                                                                                                                                                                                                                 |                                                                                                                                                                                                                                                                                                                                                                                                                                                                                                                                                                                                                                                                                                                                                                                                                            |
|---------------|-------------------------------------------------------------------------------------------------------------------------------------------------------------------------------------------------------------------------------------------------------------------------------------------------------------------------------------------------------------------------------------------------------------------------------------------------------------------------------------------------------------------------------------------------------------------------------------------------------------------------------------------------------------------------------------------------------------------------------------------------------------------------------------------------------------------------------------------------------------------------------------------------|----------------------------------------------------------------------------------------------------------------------------------------------------------------------------------------------------------------------------------------------------------------------------------------------------------------------------------------------------------------------------------------------------------------------------------------------------------------------------------------------------------------------------------------------------------------------------------------------------------------------------------------------------------------------------------------------------------------------------------------------------------------------------------------------------------------------------|
|               | <p><i>Streptomyces hygrosopicus</i><br/> <i>Streptomyces iranensis</i><br/> <i>Streptomyces parvulus</i><br/> <i>Streptomyces</i> sp. 11-1-2<br/> <i>Streptomyces</i> sp. 3211<br/> <i>Streptomyces</i> sp. Sge12 –<br/> <i>Streptomyces</i> sp. WAC00288</p>                                                                                                                                                                                                                                                                                                                                                                                                                                                                                                                                                                                                                                   | <p>soil<br/> soil<br/> soil<br/> soil, nitrogen fixation, plant associated<br/> soil<br/> forest soil, nitrogen fixation<br/> soil</p>                                                                                                                                                                                                                                                                                                                                                                                                                                                                                                                                                                                                                                                                                     |
| Bacteroidetes | <p><i>Aequorivita sublithinicola</i><br/> <i>Alkalitalea saponilacus</i><br/> <i>Arenibacter algicola</i><br/> <i>Bacteroides caccae</i><br/> <i>Bacteroides caecimuris</i><br/> <i>Bacteroidetes bacterium</i><br/> <i>Bacteroides fragilis</i><br/> <i>Bacteroides uniformis</i><br/> <i>Chryseobacterium taklimakanense</i><br/> <i>Chryseobacterium</i> sp. 3008163<br/> <i>Cyclobacterium amurskyense</i><br/> <i>Cyclobacterium marinum</i><br/> <i>Dyadobacter fermentans</i><br/> <i>Echinicola strongylocentroti</i><br/> <i>Echinicola vietnamensis</i><br/> <i>Elizabethkingia meningoseptica</i><br/> <i>Flavobacterium anhuiense</i><br/> <i>Flavobacterium arcticum</i><br/> <i>Flavobacterium branchiophilum</i><br/> <i>Flavobacterium branchiophilum</i> FL<br/> <i>Flavobacterium columnare</i><br/> <i>Flavobacterium crassostreae</i><br/> <i>Flavobacterium gilvum</i></p> | <p>Isolated from Antarctic quartz stone<br/> alkaliphilic, soda lake<br/> from marine diatom (<i>Skeletonema marinoi</i> ST54)<br/> animal gut<br/> animal gut<br/> freshwater lake<br/> animal gut<br/> animal gut<br/> permafrost, tundra soil, high Arctic soil<br/> soil, plant associated<br/> marine, heterotrophic<br/> marine, from sand dollar, coastal marine wetland<br/> soil, plant associated, nitrogen fixation<br/> marine, from sea urchin (<i>Stronglyocentrotus intermedius</i>)<br/> marine, sea water (mussel farm), halotolerant<br/> water, marine, soil, from fish &amp; amphibians<br/> soil<br/> Arctic marine<br/> aquatic, fish pathogen (salmonid)<br/> cold fresh water, fish pathogen<br/> fish pathogen (catfish)<br/> isolated from Pacific oyster<br/> stream water<br/> warm spring</p> |

|                                        |                                                 |
|----------------------------------------|-------------------------------------------------|
| <i>Flavobacterium indicum</i>          | soil, freshwater                                |
| <i>Flavobacterium johnsoniae</i>       | Antarctic penguin feces                         |
| <i>Flavobacterium kingsejongi</i>      |                                                 |
| <i>Flavobacterium psychrophilum</i>    | cold aquatic, fish pathogen (salmonid)          |
| <i>Flavobacterium</i> sp. 140616W15    | cold freshwater, fish                           |
| <i>Flavobacterium</i> sp. CJ74         | saline Antarctica lake                          |
| <i>Flavobacterium</i> sp. HYN0049      | lake water                                      |
| <i>Flavobacterium</i> sp. MEBiC07310   | tidal flat sediment                             |
| <i>Candidatus Fluviicola riflensis</i> | aquifer                                         |
| <i>Fluviicola taffensis</i>            | freshwater                                      |
| <i>Gillisia</i> sp. Hel1_33_143        | cold marine                                     |
| <i>Gramella</i> sp. SH35               | tidal flat                                      |
| <i>Hymenobacter sedentarius</i>        | soil                                            |
| <i>Hymenobacter</i> sp. PAMC 26554     | from Antarctic lichen                           |
| <i>Kordia</i> sp. SMS9                 | associated with diatoms                         |
| <i>Maribacter</i> sp.                  | marine                                          |
| <i>Maribacter</i> sp. 1_2014MBL_MicDiv | marine sediment, sea water                      |
| <i>Maribacter</i> sp. T28              | marine                                          |
| Marinifilaceae bacterium SPP2          | Antarctic marine sediment                       |
| <i>Mariniflexile</i> sp. TRM1-10       | marine, associated with brown algae             |
| <i>Marivirga tractuosa</i>             | beach sand                                      |
| <i>Mucilaginibacter gotjawali</i>      | forest soil                                     |
| <i>Mucilaginibacter</i> sp. BJC16-A31  | soil                                            |
| <i>Mucilaginibacter</i> sp. HYN0043    | cold soil, permafrost                           |
| <i>Myroides odoratimimus</i>           | freshwater, opportunist (on animals)            |
| <i>Myroides profundus</i>              | deep-sea sediment                               |
| <i>Pedobacter cryoconitis</i>          | psychrotolerant, from alpine glacier cryoconite |
| <i>Pedobacter heparinus</i>            | soil                                            |
| <i>Pedobacter steynii</i>              | stream                                          |
| <i>Prevotella jejuni</i>               | animal gut                                      |
| <i>Pseudarcicella</i> sp.              | associated with annelids (leeches)              |

|               |                                                                                                                                                                                                                                                                                                                                                                                                                                                |                                                                                                                                                                                                                    |
|---------------|------------------------------------------------------------------------------------------------------------------------------------------------------------------------------------------------------------------------------------------------------------------------------------------------------------------------------------------------------------------------------------------------------------------------------------------------|--------------------------------------------------------------------------------------------------------------------------------------------------------------------------------------------------------------------|
|               | <i>Pseudopedobacter saltans</i><br><i>Sediminicola</i> sp.<br><i>Sediminicola</i> sp. YIK13<br><i>Solitalea canadensis</i><br><i>Sphingobacterium mizutaii</i><br><i>Sphingobacterium</i> sp. 21<br><i>Sphingobacterium</i> sp. B29<br><i>Tamlana</i> sp. UJ94<br><i>Weeksella virosa</i>                                                                                                                                                      | cold soil<br>marine sediment<br>marine<br>cold soil, freshwater<br>soil<br>Antarctic soil<br>soil, animal associated<br>marine<br>animal associated                                                                |
| Cyanobacteria | <i>Arthrospira</i> sp. PCC 8005                                                                                                                                                                                                                                                                                                                                                                                                                | alkaline lakes                                                                                                                                                                                                     |
| Elusimicrobia | <i>Elusimicrobium</i> sp.                                                                                                                                                                                                                                                                                                                                                                                                                      | protozoan endosymbiont                                                                                                                                                                                             |
| Firmicutes    | <i>Bacillus cereus</i><br><i>Blautia coccoides</i><br><i>Caecibacter massiliensis</i><br><i>Clostridium pasteurianum</i><br><i>Dialister pneumosintes</i><br><i>Eubacterium siraeum</i><br><i>Lactobacillus plantarum</i><br><i>Megasphaera hexanoica</i><br><i>Negativicoccus massiliensis</i><br><i>Paenibacillus polymyxa</i> ATCC 842<br><i>Paenibacillus</i> sp. FSL R7-0331<br><i>Paenisporosarcina</i> sp.<br><i>Staphylococcus</i> sp. | soil<br>animal gut<br>animal gut<br>nitrogen fixation<br>animal associated<br>animal associated<br>animal gut<br>animal gut<br>animal gut<br>soil<br>soil, water<br>psychrophilic, Antarctica<br>animal associated |
| Nitrospinae   | uncultured <i>Nitrospina</i> sp.                                                                                                                                                                                                                                                                                                                                                                                                               | marine, nitrite-oxidizing                                                                                                                                                                                          |
| Planctomyces  | <i>Paludisphaera borealis</i>                                                                                                                                                                                                                                                                                                                                                                                                                  | northern peat bog and tundra                                                                                                                                                                                       |



|                                                               |                                                                                                                                                                                                                                                                                                                                                                                                                                                                                                                                                                                                                                                                                                                                                                         |                                                                                                                                                                                                                                                                                                                                                                                                                                                                                                                                                                                                                                                                         |
|---------------------------------------------------------------|-------------------------------------------------------------------------------------------------------------------------------------------------------------------------------------------------------------------------------------------------------------------------------------------------------------------------------------------------------------------------------------------------------------------------------------------------------------------------------------------------------------------------------------------------------------------------------------------------------------------------------------------------------------------------------------------------------------------------------------------------------------------------|-------------------------------------------------------------------------------------------------------------------------------------------------------------------------------------------------------------------------------------------------------------------------------------------------------------------------------------------------------------------------------------------------------------------------------------------------------------------------------------------------------------------------------------------------------------------------------------------------------------------------------------------------------------------------|
|                                                               |                                                                                                                                                                                                                                                                                                                                                                                                                                                                                                                                                                                                                                                                                                                                                                         |                                                                                                                                                                                                                                                                                                                                                                                                                                                                                                                                                                                                                                                                         |
| <p>Proteobacteria<br/> <math>\alpha</math>-proteobacteria</p> | <p><i>Acidiphilium multivorum</i> AIU301<br/> <i>Acidiphilium cryptum</i> JF-5<br/> <i>Azorhizobium caulinodans</i> ORS 571<br/> <i>Pseudolabrys taiwanensis</i><br/> <i>Candidatus Filomicrobium marinum</i><br/> <i>Methylorubrum extorquens</i></p>                                                                                                                                                                                                                                                                                                                                                                                                                                                                                                                  | <p>metabolism of arsenate/arsenite compounds, pyrite mine<br/> chromate (IV) reduction, iron (III) reduction<br/> nitrogen fixer, plant associated<br/> soil<br/> cold marine, methylotroph<br/> methylotrophic, plant associated</p>                                                                                                                                                                                                                                                                                                                                                                                                                                   |
| <p><math>\beta</math>-proteobacteria</p>                      | <p><i>Achromobacter ruhlandii</i><br/> <i>Achromobacter xylosoxidans</i><br/> <i>Acidovorax carolinensis</i><br/> <i>Acidovorax cattleyae</i><br/> <i>Acidovorax</i> sp. 1608163<br/> <i>Azoarcus</i> sp.<br/> <i>Azoarcus</i> sp. DN11<br/> <i>Dechloromonas</i> sp.<br/> <i>Delftia acidovorans</i><br/> <i>Ferribacterium</i> sp.<br/> <i>Ferriphaselus amnicola</i><br/> <i>Hydrogenophaga</i> sp. RAC07<br/> <i>Kineococcus radiotolerans</i><br/> <i>Limnohabitans australis</i><br/> <i>Limnohabitans</i> sp. MMS-10A-192<br/> <i>Limnohabitans</i> sp. Rim11<br/> <i>Limnohabitans</i> sp. Rim49<br/> <i>Limnohabitans</i> sp. SP2<br/> <i>Massilia buxea</i><br/> <i>Massilia glaciei</i><br/> <i>Massilia putida</i><br/> <i>Methylophilus leisingeri</i></p> | <p>soil<br/> moist environments<br/> soil<br/> soil, plant associated<br/> sediments<br/> nitrogen fixation<br/> groundwater, denitrification<br/> nitrite reduction, nitrogen fixation, assimilation<br/> soil, rock<br/> freshwater lake sediment, iron (III) reduction<br/> groundwater, iron-oxidizing<br/> aquatic<br/> radiation tolerant, halotolerant, aquatic, endolithic comm.<br/> freshwater<br/> freshwater lakes<br/> freshwater<br/> freshwater (streams and lakes)<br/> planktonic freshwater lakes and streams<br/> rock surface on lake shore<br/> glacier (Tibet)<br/> isolated from wolfram (manganese tungstate) mine<br/> soil, methylophilic</p> |

|                                           |                                                                                                                                                                                                                                                                                                                                                                                                                                                                                                                                                                                                                                                                                                                                                                                                                                                                                                                                                                                                                                                                                                                                                                                  |                                                                                                                                                                                                                                                                                                                                                                                                                                                                                                                                                                                                                                                                                                                                                                                                                                                                                                                                                                                  |
|-------------------------------------------|----------------------------------------------------------------------------------------------------------------------------------------------------------------------------------------------------------------------------------------------------------------------------------------------------------------------------------------------------------------------------------------------------------------------------------------------------------------------------------------------------------------------------------------------------------------------------------------------------------------------------------------------------------------------------------------------------------------------------------------------------------------------------------------------------------------------------------------------------------------------------------------------------------------------------------------------------------------------------------------------------------------------------------------------------------------------------------------------------------------------------------------------------------------------------------|----------------------------------------------------------------------------------------------------------------------------------------------------------------------------------------------------------------------------------------------------------------------------------------------------------------------------------------------------------------------------------------------------------------------------------------------------------------------------------------------------------------------------------------------------------------------------------------------------------------------------------------------------------------------------------------------------------------------------------------------------------------------------------------------------------------------------------------------------------------------------------------------------------------------------------------------------------------------------------|
| <p><math>\delta</math>-proteobacteria</p> | <p><i>Methylophilus</i> sp.<br/> <i>Candidatus</i> <i>Methylopumilus planktonicus</i><br/> <i>Methylorubrum extorquens</i><br/> <i>Methylotenera</i> sp.<br/> <i>Methylotenera versatilis</i><br/> <i>Methylovorus glucosotrophus</i><br/> <i>Methylovorus glucosetrophus</i> SIP3-4<br/> <i>Methylovorus</i> sp. MP688<br/> <i>Candidatus</i> <i>Nitrotoga</i> sp.<br/> uncultured <i>Nitrosomonas</i> sp.<br/> <i>Pandoraea oxalativorans</i><br/> <i>Paraburkholderia bannensis</i><br/> <i>Paraburkholderia mimosarum</i><br/> <i>Paraburkholderia phymatum</i> STM815<br/> <i>Raoultella planticola</i><br/> <i>Rhizobacter gummiphilus</i><br/> uncultured <i>Rhodoferrax</i> sp.<br/> <i>Sulfuriferula thiophila</i><br/> <i>Thauera aromatica</i> K172<br/> <i>Thauera hydrothermalis</i><br/> <i>Thauera</i> sp. K11<br/> <i>Undibacterium amnicola</i><br/> <i>Undibacterium</i> sp.<br/> <i>Variovorax boronicumulans</i><br/> <i>Variovorax</i> sp. PMC12</p> <p><i>Anaeromyxobacter</i> sp. Fw109-5<br/> uncultured <i>Desulfobacterium</i> sp.<br/> <i>Desulfococcus multivorans</i><br/> <i>Desulfococcus oleovorans</i><br/> <i>Desulfurella acetivorans</i></p> | <p>freshwater, methylotroph<br/> pelagic freshwater methylotroph, planktonic, lake<br/> soil, plant associated, methylotroph<br/> lake sediment methylotroph<br/> lake sediment, methylotroph<br/> marine methylotroph<br/> lake methylotroph<br/> soil methylotroph<br/> low temperature, nitrite oxidizer (nitrification)<br/> ammonia oxidation to nitrite (nitrification)<br/> environmental, various<br/> acidic swamp<br/> soil, plant associated<br/> soil, plant associated, nitrogen fixation<br/> water, soil, fish<br/> soil<br/> aquatic, psychrotolerant<br/> hot spring, sulfur-oxidizing, chemolithoautotrophy<br/> NO reduction<br/> thermophilic, hot spring<br/> river sediment<br/> stream water<br/> freshwater stream<br/> soil<br/> soil, plant associated</p> <p>subsurface sediments, metal reducing<br/> sediment, water, sulfate reducing<br/> sediments, sulfate reducing, marine<br/> mud<br/> thermophilic, sulfur-reducing, cyanobacterial mat</p> |
|-------------------------------------------|----------------------------------------------------------------------------------------------------------------------------------------------------------------------------------------------------------------------------------------------------------------------------------------------------------------------------------------------------------------------------------------------------------------------------------------------------------------------------------------------------------------------------------------------------------------------------------------------------------------------------------------------------------------------------------------------------------------------------------------------------------------------------------------------------------------------------------------------------------------------------------------------------------------------------------------------------------------------------------------------------------------------------------------------------------------------------------------------------------------------------------------------------------------------------------|----------------------------------------------------------------------------------------------------------------------------------------------------------------------------------------------------------------------------------------------------------------------------------------------------------------------------------------------------------------------------------------------------------------------------------------------------------------------------------------------------------------------------------------------------------------------------------------------------------------------------------------------------------------------------------------------------------------------------------------------------------------------------------------------------------------------------------------------------------------------------------------------------------------------------------------------------------------------------------|

|                                           |                                                                                                                                                                                                                                                                                                                                                                                                                                                                                                                                                                                                                                                                                                                                                                                          |                                                                                                                                                                                                                                                                                                                                                                                                                                                                                                                                                                                                                                                            |
|-------------------------------------------|------------------------------------------------------------------------------------------------------------------------------------------------------------------------------------------------------------------------------------------------------------------------------------------------------------------------------------------------------------------------------------------------------------------------------------------------------------------------------------------------------------------------------------------------------------------------------------------------------------------------------------------------------------------------------------------------------------------------------------------------------------------------------------------|------------------------------------------------------------------------------------------------------------------------------------------------------------------------------------------------------------------------------------------------------------------------------------------------------------------------------------------------------------------------------------------------------------------------------------------------------------------------------------------------------------------------------------------------------------------------------------------------------------------------------------------------------------|
| <p><math>\gamma</math>-proteobacteria</p> | <p><i>Geobacter</i> sp.<br/>uncultured Geobacteraceae bacterium<br/><i>Hippea maritima</i><br/><i>Syntrophus aciditrophicus</i></p> <p><i>Aeromonas hydrophila</i><br/><i>Brenneria nigrifluens</i><br/><i>Buchnera aphidicola</i><br/><i>Cellvibrio gandavensis</i><br/>uncultured <i>Cellvibrio</i> sp.<br/><i>Enterobacter</i> sp.<br/><i>Gilvamarinus</i> sp.<br/>uncultured <i>Nitrosococcus</i> sp.<br/><i>Klebsiella pneumoniae</i><br/><i>Limnobaculum parvum</i><br/><i>Lysobacter</i> sp. THG-D1<br/><i>Pseudalteromonas</i> sp. 60CBH<br/><i>Pseudomonas stutzeri</i><br/><i>Pseudomonas xanthomarina</i><br/><i>Rugamonas rubra</i><br/><i>Serratia plymuthica</i> PRI-2C<br/><i>Stenotrophomonas</i> sp. SO7.1<br/><i>Vibrio parahaemolyticus</i><br/><i>Vibrio</i> sp.</p> | <p>organic and metal oxidation<br/>iron (II) reduction, manganese reduction<br/>marine hydrothermal vent sediments, sulfur-reducing<br/>sediment</p> <p>cold fresh and brackish water<br/>plant associated<br/>arthropod endosymbiont<br/>soil<br/>spring water<br/>animal gut<br/>associated with seaweed<br/>marine, ammonia oxidizer<br/>animal gut<br/>freshwater<br/>soil, water, plant associated, hydrothermal vents<br/>psychrophilic, deep marine<br/>soil, denitrification<br/>from marine ascidian (sea squirt - tunicate)<br/>soil, rivers<br/>soil, plant associated<br/>copper mine drainage<br/>brackish water, saltwater<br/>saltwater</p> |
| <p>Hydrogenophilalia</p>                  | <p><i>Hydrogenophilus thermoluteolus</i></p>                                                                                                                                                                                                                                                                                                                                                                                                                                                                                                                                                                                                                                                                                                                                             | <p>thermophilic chemolithoautotrophy</p>                                                                                                                                                                                                                                                                                                                                                                                                                                                                                                                                                                                                                   |
| <p>Oligoflexia</p>                        | <p><i>Silvanigrella aquatica</i></p>                                                                                                                                                                                                                                                                                                                                                                                                                                                                                                                                                                                                                                                                                                                                                     | <p>freshwater</p>                                                                                                                                                                                                                                                                                                                                                                                                                                                                                                                                                                                                                                          |
| <p>Undetermined</p>                       | <p>Unknown bacterium endosymbiont<br/>uncultured bacterium 183_29_M04</p>                                                                                                                                                                                                                                                                                                                                                                                                                                                                                                                                                                                                                                                                                                                | <p>endosymbiont of arthropod<br/>from coal bed core, salt marsh sediment, fish pathogen</p>                                                                                                                                                                                                                                                                                                                                                                                                                                                                                                                                                                |

|                               |                                                                                                                                                                                                                    |                                                                                                                        |
|-------------------------------|--------------------------------------------------------------------------------------------------------------------------------------------------------------------------------------------------------------------|------------------------------------------------------------------------------------------------------------------------|
| <b>EUKARYA</b>                |                                                                                                                                                                                                                    |                                                                                                                        |
| Animalia<br>Arthropoda        | <i>Euryischia</i> sp. RDB-1999<br><i>Gryllus bimaculatus</i><br><i>Linepithema humile</i>                                                                                                                          | arthropod (Australia)<br>arthropod (Africa)<br>arthropod (South America)                                               |
| Apicomplexa                   | <i>Plasmodium cynomolgi</i><br><i>Plasmodium knowlesi</i><br><i>Plasmodium vivax</i>                                                                                                                               | parasite of arthropods, vertebrates<br>parasite of arthropods, vertebrates<br>parasite of arthropods, vertebrates      |
| Archaeplastida<br>Chlorophyta | <i>Chlamydomonas</i> sp. UWO241<br><i>Chlamydomonas noctigama</i><br><i>Chloropicon primus</i><br><i>Dunaliella salina</i><br>Green microalgae<br><i>Haematococcus lacustris</i><br><i>Monoraphidium neglectum</i> | Antarctic<br>freshwater, terrestrial<br>marine microalga<br>halophilic microalga<br>marine<br>freshwater<br>freshwater |
| Streptophyta                  | Species from several plant families                                                                                                                                                                                | likely pollen or plant parts from glacier                                                                              |
| Excavata<br>Euglenozoa        | <i>Parabodo caudatus</i><br><i>Parabodo nitrophilus</i><br><i>Rhynchomonas nasuta</i><br><i>Rhynchobodo</i> ATCC50359<br><i>Dimastigella mimosa</i><br><i>Dimastigella trypaniformis</i>                           | freshwater<br>freshwater<br>marine and freshwater<br>freshwater<br>soils<br>soils                                      |

|                       |                                                                                                                                                                                                                                                                                                                                                                        |                                                                                                                                                                                                                                                                                     |
|-----------------------|------------------------------------------------------------------------------------------------------------------------------------------------------------------------------------------------------------------------------------------------------------------------------------------------------------------------------------------------------------------------|-------------------------------------------------------------------------------------------------------------------------------------------------------------------------------------------------------------------------------------------------------------------------------------|
| Trypanosoma           | <i>Leishmania donovani</i><br><i>Leishmania major</i><br><i>Leptomonas pyrrocoris</i><br><i>Leptomonas seymouri</i><br><i>Trypanosoma carassii</i><br><i>Trypanosoma cruzi</i><br><i>Trypanosoma dionisii</i><br><i>Trypanosoma rotatorium</i><br><i>Trypanosoma sp.</i><br><i>Trypanosoma triglae</i>                                                                 | arthropod, vertebrate<br>arthropod, vertebrate<br>arthropod<br>arthropod<br>annelids (leeches), fish (carp)<br>arthropods, vertebrates<br>arthropods, vertebrates<br>amphibians, annelids (leeches), arthropods<br>animals<br>annelids (leeches), fish (carp)                       |
| Fungi<br>Ascomycota   | <i>Saccharomyces sp.</i><br><i>Magnaporthe oryzae</i><br><i>Nannizzia gypsea</i>                                                                                                                                                                                                                                                                                       | aquatic, soil, plants<br>plant pathogen<br>opportunistic on animals, soil                                                                                                                                                                                                           |
| Haptophyta            | <i>Emiliana huxleyi</i>                                                                                                                                                                                                                                                                                                                                                | coccolithophore, marine                                                                                                                                                                                                                                                             |
| Heterokonta (diatoms) | <i>Chaetoceros decipiens</i><br><i>Cylindrotheca closterium</i><br><i>Cylindrotheca sp.</i><br><i>Eucampia zodiacus</i><br><i>Nitzschia sp.</i><br><i>Navicula sp.</i><br><i>Navicula cryptotenella</i><br><i>Navicula arenaria</i><br><i>Pseudo-nitzschia americana</i><br><i>Skeletonema potamos</i><br><i>Skeletonema costatum</i><br><i>Thalassiosira lundiana</i> | polar marine diatom<br>marine diatom<br>marine diatom<br>marine diatom<br>marine diatom<br>aquatic diatom<br>benthic marine diatom<br>diatom, brackish water<br>planktonic marine diatom<br>diatom, brackish water and freshwater<br>marine diatom, brackish water<br>marine diatom |

**Table S2. Characteristics of organisms in western region of embayment.** Taxa in the accretion ice representing the western section of the embayment (3,540 + 3,569 m sections), where characteristics could be determined.

| Taxonomy                          | Species/Strain/Isolate                                                                                                                                                                                                                                                                                                                                                                                                                                                                                                                                                                  | Characteristics (habitat, habit, functions)                                                                                                                                                                                                                                                                                                                                                                            |
|-----------------------------------|-----------------------------------------------------------------------------------------------------------------------------------------------------------------------------------------------------------------------------------------------------------------------------------------------------------------------------------------------------------------------------------------------------------------------------------------------------------------------------------------------------------------------------------------------------------------------------------------|------------------------------------------------------------------------------------------------------------------------------------------------------------------------------------------------------------------------------------------------------------------------------------------------------------------------------------------------------------------------------------------------------------------------|
| <b>ARCHAEA</b>                    | <i>Halobacterium salinarum</i> R1                                                                                                                                                                                                                                                                                                                                                                                                                                                                                                                                                       | marine, halophilic                                                                                                                                                                                                                                                                                                                                                                                                     |
| <b>BACTERIA</b><br>Actinobacteria | <i>Aeromicrobium</i> sp. A1-2<br><i>Amycolatopsis</i> sp. BJA-103<br><i>Auraticoccus monumenti</i><br><i>Brachybacterium saurashtrense</i><br><i>Brachybacterium</i> sp.<br><i>Clavibacter michiganensis</i><br><i>Corynebacterium timonense</i><br><i>Kitasatospora setae</i><br><i>Gordonia</i> sp. 1D<br><i>Marmoricola scoriae</i><br><i>Micromonospora aurantiaca</i><br><i>Micromonospora echinofusca</i><br><i>Micromonospora coxensis</i><br><i>Micromonospora</i> sp. L5<br><i>Micromonospora tulbaghia</i><br><i>Mycobacterium kansasii</i><br><i>Mycobacterium</i> sp. JS623 | marine sediments, Antarctica<br>soil<br>sandstone<br>soil, halotolerant, plant associated<br>soil, animal feces<br>soil, plant associated<br>soil, water, animal associated<br>soil<br>soil, thermotolerant<br>volcanic soil<br>soil, plant associated<br>from marine sponge<br>sandy soil<br>sediment, nitrate reduction, nitrogen fixation<br>soil, plant associated<br>fresh water, brackish water<br>environmental |

|                          |                                                                                                                                                                                                                                                                                                                                                                                                                                                                                                                                                                                                                                 |                                                                                                                                                                                                                                                                                                                                                                    |
|--------------------------|---------------------------------------------------------------------------------------------------------------------------------------------------------------------------------------------------------------------------------------------------------------------------------------------------------------------------------------------------------------------------------------------------------------------------------------------------------------------------------------------------------------------------------------------------------------------------------------------------------------------------------|--------------------------------------------------------------------------------------------------------------------------------------------------------------------------------------------------------------------------------------------------------------------------------------------------------------------------------------------------------------------|
|                          | <i>Nocardia</i> sp. CFHS0054<br><i>Plantactinospira</i> sp. KBS50<br><i>Pseudonocardia</i> sp. HH130630-07<br><i>Rhodococcus aetherivorans</i><br><i>Rhodococcus opacus</i><br><i>Rhodococcus</i> sp. WB1<br><i>Streptomyces albus</i><br><i>Streptomyces formicae</i><br><i>Streptomyces pluripotens</i><br><i>Streptomyces sampsonii</i><br><i>Streptomyces</i> sp. 3211<br><i>Streptomyces</i> sp. FR-008<br><i>Streptomyces</i> sp. GSSD-12<br><i>Streptomyces</i> sp. Sge12<br><i>Streptomyces</i> sp. SM17<br><i>Streptomyces</i> sp. WAC00288<br><i>Tessaracoccus</i> sp. T2.5-30<br><i>Tsukamurella tyrosinosolvans</i> | nitrate reduction, environmental<br>marine<br>soil, arthropod associated<br>soil, bioreactor<br>soil, chemolithotrophic<br>soil<br>soil<br>soil, arthropod associated<br>mangrove soil<br>soil<br>soil<br>soil<br>forest soil<br>from marine sponge ( <i>Haliclona simulans</i> )<br>soil, alkalitolerant<br>deep subsurface pyritic rock belt<br>water, air, soil |
| Cyanobacteria            | <i>Arthrospira</i> sp. PCC 8005<br>uncultured cyanobacterium                                                                                                                                                                                                                                                                                                                                                                                                                                                                                                                                                                    | alkaline and brackish water<br>marine                                                                                                                                                                                                                                                                                                                              |
| Gemmatimonadetes         | <i>Gemmatirosa kalamazoonesis</i>                                                                                                                                                                                                                                                                                                                                                                                                                                                                                                                                                                                               | soil                                                                                                                                                                                                                                                                                                                                                               |
| Proteobacteria           |                                                                                                                                                                                                                                                                                                                                                                                                                                                                                                                                                                                                                                 |                                                                                                                                                                                                                                                                                                                                                                    |
| Acidithiobacillia        | <i>Acidithiobacillus ferrivorans</i> SS3<br><i>Acidithiobacillus ferrooxidans</i> ATCC 23270<br><i>Acidithiobacillus ferrooxidans</i> ATCC 53993                                                                                                                                                                                                                                                                                                                                                                                                                                                                                | acidophilic, psychrotolerant, mining stream<br>bituminous coal mining stream, iron-oxidation<br>acidophilic, acid mine drainage, iron-oxidizing                                                                                                                                                                                                                    |
| $\alpha$ -proteobacteria | <i>Azospirillum brasilense</i> Sp245 (alpha)<br><i>Azospirillum</i> sp. CFH 70021                                                                                                                                                                                                                                                                                                                                                                                                                                                                                                                                               | soil, nitrogen fixation<br>hot spring water                                                                                                                                                                                                                                                                                                                        |

|                                                                                         |                                                                                                                                                                                                                                                                                                                                                                                                                                                                                                                                                                                                |                                                                                                                                                                                                                                                                                                                                                                                                                   |
|-----------------------------------------------------------------------------------------|------------------------------------------------------------------------------------------------------------------------------------------------------------------------------------------------------------------------------------------------------------------------------------------------------------------------------------------------------------------------------------------------------------------------------------------------------------------------------------------------------------------------------------------------------------------------------------------------|-------------------------------------------------------------------------------------------------------------------------------------------------------------------------------------------------------------------------------------------------------------------------------------------------------------------------------------------------------------------------------------------------------------------|
| <p>β-proteobacteria</p>                                                                 | <p><i>Phenylobacterium zucineum</i><br/> <i>Rhodopseudomonas palustris</i> BisA53</p> <p><i>Achromobacter ruhlandii</i><br/> <i>Achromobacter xylosoxidans</i><br/> <i>Bordetella bronchialis</i><br/> <i>Bordetella petrii</i><br/> <i>Massilia putida</i><br/> <i>Massilia sp.</i> WG5<br/> <i>Methyloversatilis sp.</i> RAC08<br/> <i>Pandoraea oxalativorans</i><br/> <i>Pandoraea pnomenusa</i><br/> <i>Paraburkholderia aromaticivorans</i><br/> <i>Paraburkholderia caledonica</i><br/> <i>Paraburkholderia sprentiae</i> WSM5005<br/> <i>Thiobacillus denitrificans</i> ATCC 25259</p> | <p>aquifer, groundwater, sediments, soil, animals<br/> sediment</p> <p>soil<br/> soil<br/> environmental sources, animal associated<br/> environmental sources, animal associated<br/> wolfram mine<br/> soil<br/> haptophyte associated<br/> soil, chemolithoautotroph<br/> soil, animal associated<br/> soil<br/> soil<br/> soil, plant associated<br/> groundwater, chemolithoautotrophy, sulfur-oxidation</p> |
| <p>δ-proteobacteria</p>                                                                 | <p><i>Sorangium cellulosum</i> So ce56</p>                                                                                                                                                                                                                                                                                                                                                                                                                                                                                                                                                     | <p>soil</p>                                                                                                                                                                                                                                                                                                                                                                                                       |
| <p>γ-proteobacteria</p>                                                                 | <p><i>Pasteurella multocida</i><br/> <i>Serratia plymuthica</i> PRI-2C<br/> <i>Shigella sonnei</i><br/> <i>Sulfurifustis variabilis</i></p>                                                                                                                                                                                                                                                                                                                                                                                                                                                    | <p>soil, animal associated<br/> soil, plant associated<br/> aquatic, animal gut<br/> lake sediment, sulfur-oxidation, autotroph</p>                                                                                                                                                                                                                                                                               |
| <p><b>EUKARYA</b><br/> Animalia<br/> Arthropoda<br/> Chordata<br/> Platyhelminthese</p> | <p><i>Linepithema humile</i><br/> <i>Gavialis gangeticus</i><br/> <i>Spirometra erinaceieuropaei</i></p>                                                                                                                                                                                                                                                                                                                                                                                                                                                                                       | <p>arthropod (South America)<br/> reptile<br/> tapeworm</p>                                                                                                                                                                                                                                                                                                                                                       |



|                               |                                        |                                  |
|-------------------------------|----------------------------------------|----------------------------------|
| Archaeplastida<br>Chlorophyta | <i>Monoraphidium neglectum</i>         | freshwater green alga            |
| Streptophyta                  | Species from a few plant species       | likely pollen from glacier       |
| Excavata<br>Trypanosoma       | <i>Trypanosoma grayi</i>               | amphibians, annelids, arthropods |
| Fungi<br>Ascomycota           | <i>Metarhizium brunneum</i> ARSEF 3297 | soil, arthropod associated       |

**Table S3. Characteristics of organisms in the middle portion of the embayment.** Taxa in the accretion ice representing the central section of the embayment (3,563 + 3,585 m sections), where characteristics could be determined. Data from refs. [1,2].

| Taxonomy                          | Species/Strain/Isolate                                                                                                                                                                                                                                                                                                                                                                                                                                                                                                                                                          | Characteristics (habitat, habit, functions)                                                                                                                                                                                                                                                                                                                                                                                                                                                                                                |
|-----------------------------------|---------------------------------------------------------------------------------------------------------------------------------------------------------------------------------------------------------------------------------------------------------------------------------------------------------------------------------------------------------------------------------------------------------------------------------------------------------------------------------------------------------------------------------------------------------------------------------|--------------------------------------------------------------------------------------------------------------------------------------------------------------------------------------------------------------------------------------------------------------------------------------------------------------------------------------------------------------------------------------------------------------------------------------------------------------------------------------------------------------------------------------------|
| <b>BACTERIA</b><br>Actinobacteria | <i>Actinomyces georgiae</i><br><i>Actinomyces oris</i><br><i>Actinomyces viscosus</i><br><i>Agrococcus</i> sp.<br><i>Arsenicococcus bolidensis</i><br><i>Arthrobacter flavus</i><br><i>Arthrobacter</i> sp. 01-Au-006/3<br><i>Arthrobacter</i> sp. V2M1<br><i>Atopobium parvulum</i><br><i>Bifidobacterium gallinarum</i><br><i>Bifidobacterium</i> sp.<br><i>Blastococcus</i> sp.<br><i>Clavibacter michiganensis</i><br><i>Corynebacterium durum</i><br><i>Corynebacterium</i> sp.<br><i>Dermabacter</i> sp.<br><i>Frankia</i> sp.<br><i>Frigoribacterium</i> sp. GWS-SE-H243 | soil, animal associated<br>soil, animal associated<br>soil, animal associated<br>soil<br>lake sediment<br>psychrophilic, pond in McMurdo Dry Valley, Antarctica<br>sediment, desiccation resistant<br>soil<br>animal associated<br>soil, animal associated<br>soil, animal associated<br>beach sediment<br>soil, plant associated, psychrotolerant<br>soil, water, plant associated, animal associated<br>soil, water, plant associated, animal associated<br>soil, animal associated<br>soil, plant associated, nitrogen fixation<br>soil |

|  |                                                                                                                                                                                                                                                                                                                                                                                                                                                                                                                                                                                                                                                                                                                                                                                                                                                                                                                                                                          |                                                                                                                                                                                                                                                                                                                                                                                                                                                                                                                                                                                                                                                                                                                    |
|--|--------------------------------------------------------------------------------------------------------------------------------------------------------------------------------------------------------------------------------------------------------------------------------------------------------------------------------------------------------------------------------------------------------------------------------------------------------------------------------------------------------------------------------------------------------------------------------------------------------------------------------------------------------------------------------------------------------------------------------------------------------------------------------------------------------------------------------------------------------------------------------------------------------------------------------------------------------------------------|--------------------------------------------------------------------------------------------------------------------------------------------------------------------------------------------------------------------------------------------------------------------------------------------------------------------------------------------------------------------------------------------------------------------------------------------------------------------------------------------------------------------------------------------------------------------------------------------------------------------------------------------------------------------------------------------------------------------|
|  | <p> <i>Janibacter anopheles</i><br/> <i>Janibacter</i> sp. MJ436<br/> <i>Janibacter</i> sp. RC5-101<br/> <i>Janibacter terrae</i><br/> <i>Klugiella</i> sp. Cr8-25<br/> <i>Kocuria palustris</i><br/> <i>Kocuria</i> sp.<br/> <i>Leifsonia kribbensis</i><br/> <i>Leifsonia</i> sp. MSL 07<br/> Microbacteriaceae bacterium MIDF13<br/> <i>Microbacterium</i> sp.<br/> Micrococcaceae bacterium<br/> <i>Micrococcus luteus</i><br/> <i>Micrococcus</i> sp.<br/> <i>Mobilicoccus pelagius</i><br/> <i>Mycobacterium abscessus</i><br/> <i>Nesterenkonia lutea</i><br/> <i>Nesterenkonia sandarakina</i><br/> <i>Nocardioides</i> sp.<br/> <i>Parascardovia denticolens</i><br/> <i>Phycicola gilvus</i><br/> <i>Rhodococcus</i> sp. WTZ-R2<br/> <i>Rothia mucilaginoso</i><br/> <i>Rothia</i> sp.<br/> <i>Sanguibacter</i> sp. ljh-8<br/> <i>Streptomyces rimosus</i><br/> <i>Subtercola frigoramans</i><br/> <i>Thermobispora bispora</i><br/> <i>Yaniella soli</i> </p> | <p> midgut of arthropod (mosquito)<br/> saline sediment, arid soil<br/> hydrothermal marine sediment<br/> soil near wastewater treatment plant<br/> alpine glacier cryoconite<br/> soil<br/> water<br/> soil<br/> soil<br/> soil<br/> soil<br/> air, dust<br/> soil, dust, water, air<br/> soil, dust, water, air<br/> fish intestines<br/> water, soil, dust<br/> saline soil<br/> arid soil<br/> lakeside soil<br/> animal gut, animal associated<br/> marine, from seaweed<br/> sediment, sludge<br/> soil, dust, air, animal associated<br/> soil, dust, air, animal associated<br/> soil<br/> soil<br/> psychrophilic, cold groundwater<br/> soil, thermophilic, decaying manure<br/> soil, alkaliphilic </p> |
|  |                                                                                                                                                                                                                                                                                                                                                                                                                                                                                                                                                                                                                                                                                                                                                                                                                                                                                                                                                                          |                                                                                                                                                                                                                                                                                                                                                                                                                                                                                                                                                                                                                                                                                                                    |

|                      |                                                                                                                                                                                                                                                                                                                                                                                                                                                                                                                                        |                                                                                                                                                                                                                                                                                                                                                                                                         |
|----------------------|----------------------------------------------------------------------------------------------------------------------------------------------------------------------------------------------------------------------------------------------------------------------------------------------------------------------------------------------------------------------------------------------------------------------------------------------------------------------------------------------------------------------------------------|---------------------------------------------------------------------------------------------------------------------------------------------------------------------------------------------------------------------------------------------------------------------------------------------------------------------------------------------------------------------------------------------------------|
| <p>Bacteroidetes</p> | <p><i>Anoxybacillus flavithermus</i><br/> <i>Bacteroides coprocola</i><br/> <i>Bacteroides</i> sp.<br/> <i>Capnocytophaga granulosa</i><br/> <i>Flavobacterium johnsoniae</i><br/> <i>Flavobacterium</i> sp.<br/> <i>Flavobacterium</i> sp. P-131<br/> <i>Pedobacter steynii</i><br/> <i>Porphyromonas</i> sp.<br/> <i>Prevotella denticola</i><br/> <i>Prevotella melaninogenica</i><br/> <i>Prevotella</i> sp.<br/> <i>Sphingobacterium shayense</i><br/> <i>Sphingobacterium</i> sp. 0-1<br/> <i>Sphingobacterium</i> sp. MOL-1</p> | <p>geothermal hot spring, thermotolerant<br/> animal gut<br/> animal gut<br/> animal associated<br/> soil, freshwater<br/> Antarctica lake, halophilic, fish associated<br/> cold water, fish associated<br/> soil, Tibetan plateau<br/> animal associated<br/> animal associated<br/> animal associated<br/> animal associated<br/> soil<br/> lake, Tibetan plateau<br/> psychrophilic, lake water</p> |
| <p>Cyanobacteria</p> | <p><i>Anabaena azotica</i><br/> Antarctic cyanobacterium<br/> <i>Brasilonema terrestre</i><br/> <i>Calothrix</i> sp. CCMEE 5085<br/> <i>Chroococciopsis</i> sp.<br/> <br/> <i>Geitlerinema</i> sp. CCALA 138<br/> <i>Gloeocapsa</i> sp. CR_L16<br/> <i>Leptolyngbya boryana</i><br/> <i>Leptolyngbya</i> sp.<br/> <i>Lyngbya aestuarii</i><br/> <i>Lyngbya birgei</i><br/> <i>Leptolyngbya</i> sp. 22.A<br/> <i>Microcoleus</i> sp.</p>                                                                                                | <p>soil, water, nitrogen fixation<br/> Antarctic lake<br/> soil<br/> lake, Bolivian Andes<br/> desiccation-tolerant, thermotolerant, psychrotolerant,<br/> halotolerant<br/> soil, plant roots<br/> aquatic, halophilic<br/> freshwater, terrestrial<br/> freshwater<br/> marine intertidal<br/> salt marches, freshwater, autotroph<br/> freshwater<br/> ponds, lakes, soil</p>                        |

|                 |                                                                                                                                                                                                                                                                                                                                                                                                                                                                                                                                                                                                                                                                                                                                                                                                                                                                                |                                                                                                                                                                                                                                                                                                                                                                                                                                                                                                                                                                                                                                                                                                                                                               |
|-----------------|--------------------------------------------------------------------------------------------------------------------------------------------------------------------------------------------------------------------------------------------------------------------------------------------------------------------------------------------------------------------------------------------------------------------------------------------------------------------------------------------------------------------------------------------------------------------------------------------------------------------------------------------------------------------------------------------------------------------------------------------------------------------------------------------------------------------------------------------------------------------------------|---------------------------------------------------------------------------------------------------------------------------------------------------------------------------------------------------------------------------------------------------------------------------------------------------------------------------------------------------------------------------------------------------------------------------------------------------------------------------------------------------------------------------------------------------------------------------------------------------------------------------------------------------------------------------------------------------------------------------------------------------------------|
|                 | <p><i>Microcoleus vaginatus</i><br/> <i>Microcystis</i> sp.<br/> <i>Nostoc flagelliforme</i><br/> <i>Nostoc muscorum</i></p> <p><i>Nostoc</i> sp.</p> <p><i>Oscillatoria amoena</i><br/> <i>Oscillatoria lutea</i><br/> <i>Oscillatoria margaritifera</i><br/> <i>Oscillatoria nigro-viridis</i> PCC 7112<br/> <i>Oscillatoria prolifera</i><br/> <i>Oscillatoria</i> sp.<br/> <i>Oscillatoria</i> sp. 195-A20<br/> <i>Oscillatoria</i> sp. MMG-2<br/> Oscillatoriales cyanobacterium 2Dp86E<br/> Oscillatoriales cyanobacterium IL-1.4<br/> Phormidiaceae cyanobacterium CPER-KK1<br/> <i>Phormidium autumnale</i><br/> <i>Phormidium</i> sp. NIVA-CYA 203<br/> <i>Planktothricoides</i> sp.<br/> soil crust cyanobacterium<br/> <i>Synechococcus</i> sp. C9<br/> <i>Thermosynechococcus</i> sp.<br/> uncultured cyanobacterium<br/> uncultured soil crust cyanobacterium</p> | <p>freshwater, dry puddles<br/> freshwater<br/> varying temperature and moisture conditions, oligotrophic<br/> terrestrial and aquatic, desiccation resistant, nitrogen<br/> fixation<br/> aquatic, oligotrophic, psychrotolerant, desiccation resistant,<br/> soil, rock, lakes, spring<br/> marine, freshwater<br/> freshwater, Sweden<br/> marine<br/> marine<br/> freshwater reservoir<br/> freshwater, marine<br/> freshwater<br/> freshwater<br/> association with <i>Dyamena pumila</i> (white sea hydroid)<br/> marine, estuary<br/> soil<br/> freshwater, benthic mat<br/> lakewater, Spitzbergen, Svalbard<br/> freshwater<br/> soil, Antarctica<br/> ammonium-replete hot spring<br/> hot spring, thermophilic<br/> freshwater<br/> soil, rock</p> |
| Deferribacteres | <i>Mucispirillum schaedleri</i>                                                                                                                                                                                                                                                                                                                                                                                                                                                                                                                                                                                                                                                                                                                                                                                                                                                | animal intestinal tract (vertebrates and invertebrates)                                                                                                                                                                                                                                                                                                                                                                                                                                                                                                                                                                                                                                                                                                       |
|                 |                                                                                                                                                                                                                                                                                                                                                                                                                                                                                                                                                                                                                                                                                                                                                                                                                                                                                |                                                                                                                                                                                                                                                                                                                                                                                                                                                                                                                                                                                                                                                                                                                                                               |

|                     |                                                                                                                                                                                                                                                                                                                                                                                                                                                                                                                                                                                                                                                                                                                                                                                                                                                      |                                                                                                                                                                                                                                                                                                                                                                                                                                                                                                                                                                                                                                                                                                                                                                                                                                                                                                                                           |
|---------------------|------------------------------------------------------------------------------------------------------------------------------------------------------------------------------------------------------------------------------------------------------------------------------------------------------------------------------------------------------------------------------------------------------------------------------------------------------------------------------------------------------------------------------------------------------------------------------------------------------------------------------------------------------------------------------------------------------------------------------------------------------------------------------------------------------------------------------------------------------|-------------------------------------------------------------------------------------------------------------------------------------------------------------------------------------------------------------------------------------------------------------------------------------------------------------------------------------------------------------------------------------------------------------------------------------------------------------------------------------------------------------------------------------------------------------------------------------------------------------------------------------------------------------------------------------------------------------------------------------------------------------------------------------------------------------------------------------------------------------------------------------------------------------------------------------------|
| Deinococcus-Thermus | <p><i>Deinococcus marmoris</i></p> <p><i>Deinococcus radiodurans</i></p>                                                                                                                                                                                                                                                                                                                                                                                                                                                                                                                                                                                                                                                                                                                                                                             | <p>Antarctic marble, psychrophilic, lichen associated, radiation-resistant, desiccation resistant</p> <p>soil, extremophile, radiation-resistant, psychrotolerant, desiccation resistant, acidotolerant</p>                                                                                                                                                                                                                                                                                                                                                                                                                                                                                                                                                                                                                                                                                                                               |
| Firmicutes          | <p><i>Amphibacillus</i> sp.</p> <p><i>Bacillus agaradhaerens</i></p> <p><i>Bacillus cereus</i></p> <p><i>Bacillus circulans</i></p> <p><i>Bacillus cohnii</i></p> <p><i>Bacillus decisifrondis</i></p> <p><i>Bacillus halmपालus</i></p> <p><i>Bacillus horikoshii</i></p> <p><i>Bacillus horti</i></p> <p><i>Bacillus megaterium</i></p> <p><i>Bacillus</i> sp. 3LF 24T</p> <p><i>Bacillus</i> sp. 7327</p> <p><i>Bacillus</i> sp. 8SB</p> <p><i>Bacillus</i> sp. CCBAU 05776</p> <p><i>Bacillus</i> sp. CPB 7</p> <p><i>Bacillus</i> sp. MB63</p> <p><i>Bacillus</i> sp. NCIB 12289</p> <p><i>Carnobacterium mobile</i></p> <p><i>Carnobacterium</i> sp. BM-8</p> <p><i>Clostridium perfringens</i></p> <p><i>Clostridium rectum</i></p> <p><i>Enterococcus columbae</i></p> <p><i>Eubacterium cylindroides</i></p> <p><i>Eubacterium tenue</i></p> | <p>lake water, alkaliphilic, thermotoleant, desiccation resistant</p> <p>lake water, alkaiphilic, alkalitolerant</p> <p>soil, air, nitrate reduction, animal associated</p> <p>soil, animal associated, plant associated</p> <p>water, soil, sand, alkaliphilic</p> <p>soil, decayed leaves</p> <p>soil, alkaliphilic, alkalitolerant</p> <p>fish liver, alkaliphilic, alkalitolerant</p> <p>soil, alkaliphilic</p> <p>soil, psychrotolerant, thermotolerant, Antarctic geothermal lake</p> <p>soil</p> <p>uranium mine wastewater</p> <p>soil, spring, alkaliphilic</p> <p>soil, plant associated</p> <p>marine</p> <p>soil, plant associated</p> <p>soil, alkaiphilic</p> <p>water, fish and crustacean associated</p> <p>fish associated</p> <p>marine sediment, soil, animal associated</p> <p>soil, animal associated</p> <p>soil, animal associated</p> <p>soil, animal associated, intestinal</p> <p>sludge, animal associated</p> |

|                                      |                                                           |
|--------------------------------------|-----------------------------------------------------------|
| <i>Flavonifractor plautii</i>        | soil, animal associated                                   |
| <i>Geobacillus kaustophilus</i>      | deep sea sediment, thermophilic                           |
| <i>Jeotgalicoccus halotolerans</i>   | seafood, marine, halophilic                               |
| <i>Jeotgalicoccus</i> sp. YIM KMY9-1 | halophilic                                                |
| <i>Lactobacillus animalis</i>        | soil, animal associated                                   |
| <i>Lactobacillus curvatus</i>        | soil, animal associated                                   |
| <i>Lactobacillus delbrueckii</i>     | soil, animal associated                                   |
| <i>Lactobacillus fermentum</i>       | soil, animal associated, plant associated, thermotolerant |
| <i>Lactobacillus helveticus</i>      | soil, thermophilic, animal associated                     |
| <i>Lactobacillus rhamnosus</i>       | soil, animal associated                                   |
| <i>Lactobacillus salivarius</i>      | soil, animal associated                                   |
| <i>Lactococcus lactis</i>            | soil, animal associated, plant associated                 |
| <i>Marinococcus</i> sp.              | salt marsh, halophilic, chemolithoautotrophic             |
| <i>Pediococcus claussenii</i>        | water, soil, plant associated                             |
| <i>Planomicrobium</i> sp.            | coastal sediment                                          |
| <i>Planococcus maitriensis</i>       | cyanobacterial mat, Antarctica, psychrophilic             |
| <i>Planococcus psychrotoleratus</i>  | cold desert soil, psychrotolerant                         |
| <i>Planococcus</i> sp.               | cold soil, psychrotolerant                                |
| <i>Planomicrobium koreense</i>       | glacier, seafood, psychrotolerant                         |
| <i>Planomicrobium psychrophilum</i>  | marine coastal sediment                                   |
| <i>Planomicrobium</i> sp. ISL-41     | marine                                                    |
| <i>Planomicrobium</i> sp. RCML-41    | desert soil, radiation-resistant                          |
| <i>Robinsoniella peoriensis</i>      | soil, animal associated, intestinal                       |
| <i>Selenomonas sputigena</i>         | animal associated                                         |
| <i>Sporosarcina</i> sp. 4-76         | soil                                                      |
| <i>Sporosarcina</i> sp. LI4          | soil                                                      |
| <i>Staphylococcus epidermidis</i>    | soil, dust, animal associated                             |
| <i>Streptococcus australis</i>       | soil, dust, animal associated                             |
| <i>Streptococcus constellatus</i>    | soil, dust, animal associated                             |
| <i>Streptococcus cristatus</i>       | soil, dust, animal associated                             |
| <i>Streptococcus dysgalactiae</i>    | soil, dust, animal associated                             |

|                                    |                                                                                                                                                                                                                                                                                                                                                                                                                                                                                                           |                                                                                                                                                                                                                                                                                                                                                                                                                                                                                                                               |
|------------------------------------|-----------------------------------------------------------------------------------------------------------------------------------------------------------------------------------------------------------------------------------------------------------------------------------------------------------------------------------------------------------------------------------------------------------------------------------------------------------------------------------------------------------|-------------------------------------------------------------------------------------------------------------------------------------------------------------------------------------------------------------------------------------------------------------------------------------------------------------------------------------------------------------------------------------------------------------------------------------------------------------------------------------------------------------------------------|
|                                    | <p><i>Streptococcus equinus</i><br/> <i>Streptococcus intermedius</i><br/> <i>Streptococcus mitis</i><br/> <i>Streptococcus mutans</i><br/> <i>Streptococcus sanguinis</i><br/> <i>Streptococcus</i> sp.<br/> <i>Staphylococcus</i> sp.<br/> <i>Streptococcus thermophilus</i><br/> <i>Tetragenococcus doogicus</i><br/> <i>Veillonella dispar</i><br/> <i>Veillonella parvula</i></p>                                                                                                                    | <p>soil, dust, animal associated, intestinal<br/> soil, dust, animal associated<br/> soil, dust, animal associated<br/> soil, water, acidotolerant, animal associated<br/> soil, water, animal associated<br/> soil, animal associated<br/> soil<br/> water, thermotolerant<br/> seafood, halophilic<br/> animal associated<br/> animal associated</p>                                                                                                                                                                        |
| Fusobacteria                       | <i>Fusobacterium necrophorum</i>                                                                                                                                                                                                                                                                                                                                                                                                                                                                          | animal associated                                                                                                                                                                                                                                                                                                                                                                                                                                                                                                             |
| Proteobacteria<br>α-proteobacteria | <p><i>Ajifella marina</i><br/> <i>Amaricoccus</i> sp.<br/> <i>Brevundimonas</i> sp. AKB-2008-JO46<br/> <i>Brevundimonas</i> sp. MCS 35<br/> <i>Caedibacter caryophilus</i><br/> <i>Caulobacter</i> sp. cau1<br/> <i>Mesorhizobium loti</i><br/> <i>Methylobacterium fujisawaense</i><br/> <i>Methylobacterium</i> sp. iRIV1<br/> <i>Paracoccus</i> sp. HMD3141<br/> <i>Paracoccus</i> sp. J364<br/> <i>Paracoccus</i> sp. JLT1284<br/> <i>Paracoccus</i> sp. MC5-8<br/> <i>Paracoccus</i> sp. sptzw33</p> | <p>saline microbial mat<br/> soil, sludge<br/> soil, radiation resistant<br/> aquatic, halotolerant<br/> freshwater, symbiont of <i>Paramecium caudatum</i><br/> aquatic,<br/> soil, plant associated, nitrogen fixation<br/> soil, freshwater<br/> soil, plant associated, animal associated<br/> soil, denitrification, extremophilic, chemolithoautotroph<br/> soil, animal associated, denitrification<br/> marine, South China Sea<br/> snow core, Dome A, East Antarctica<br/> soil, extremophilic, denitrification</p> |



|                                           |                                                                                                                                                                                                                                                                                                                                                                                                                                                                                                                                                                                                                                                                                                                                                                                                                                                                                                                                                                        |                                                                                                                                                                                                                                                                                                                                                                                                                                                                                                                                                                                                                                                                                                                                                                                                  |
|-------------------------------------------|------------------------------------------------------------------------------------------------------------------------------------------------------------------------------------------------------------------------------------------------------------------------------------------------------------------------------------------------------------------------------------------------------------------------------------------------------------------------------------------------------------------------------------------------------------------------------------------------------------------------------------------------------------------------------------------------------------------------------------------------------------------------------------------------------------------------------------------------------------------------------------------------------------------------------------------------------------------------|--------------------------------------------------------------------------------------------------------------------------------------------------------------------------------------------------------------------------------------------------------------------------------------------------------------------------------------------------------------------------------------------------------------------------------------------------------------------------------------------------------------------------------------------------------------------------------------------------------------------------------------------------------------------------------------------------------------------------------------------------------------------------------------------------|
| <p><math>\beta</math>-proteobacteria</p>  | <p><i>Paracoccus versutus</i><br/> <i>Paracoccus yeei</i><br/> <i>Porphyrobacter</i> sp.<br/> <i>Rhodobacter changlensis</i><br/> <i>Rhodobacter</i> sp. RC5-103<br/> <i>Sphingomonas dokdonensis</i><br/> <i>Sphingomonas</i> sp. KT0216<br/> <i>Sphingomonas</i> sp.<br/> <i>Sulfitobacter</i> sp.</p> <p><i>Acidovorax defluvii</i><br/> <i>Burkholderia</i> sp.<br/> <i>Burkholderia</i> sp. Brij35<br/> <i>Burkholderia</i> sp. LD-11<br/> <i>Burkholderia</i> sp. STM1424<br/> <i>Burkholderia vietnamiensis</i><br/> <i>Caldimonas hydrothermale</i><br/> <i>Caldimonas manganoxidans</i><br/> Comamonadaceae bacterium<br/> Comamonadaceae bacterium Gu-R-8<br/> <i>Delftia acidovorans</i><br/> <i>Denitrobacter</i> sp. BBTR53<br/> <i>Diaphorobacter</i> sp. DNB7<br/> <i>Herbaspirillum huttiense</i><br/> <i>Herbaspirillum</i> sp. B601<br/> <i>Neisseria flava</i><br/> <i>Neisseria</i> sp.<br/> <i>Polaromonas</i> sp.<br/> <i>Sutterella</i> sp.</p> | <p>soil, sludge, extremophilic, denitrification<br/> soil, water, animal associated<br/> marine<br/> psychrophilic, Himalayan snow<br/> water<br/> soil<br/> soil, water, oligotrophic<br/> soil, water<br/> marine</p> <p>soil, sludge, denitrification<br/> soil, acidotolerant<br/> soil, sludge<br/> soil<br/> soil<br/> soil, nitrogen fixation, metabolically versatile<br/> thermal spring, thermophilic<br/> hot spring, thermophilic, manganese oxidation<br/> soil<br/> ancient subsurface sulfidic water<br/> soil, concentrates gold<br/> soil, sludge, denitrification<br/> soil, denitrification<br/> water<br/> soil<br/> water, soil, sediment, animal associated<br/> water, soil, sediment, animal associated<br/> groundwater, psychrophilic<br/> soil, animal associated</p> |
| <p><math>\delta</math>-proteobacteria</p> | <p>Myxococcales bacterium</p>                                                                                                                                                                                                                                                                                                                                                                                                                                                                                                                                                                                                                                                                                                                                                                                                                                                                                                                                          | <p>soil</p>                                                                                                                                                                                                                                                                                                                                                                                                                                                                                                                                                                                                                                                                                                                                                                                      |

|                  |                                                                                                                                                                                                                                                                                                                                                                                                                                                                                                                                                                                                                                                                                                                                                                                                                                                                                       |                                                                                                                                                                                                                                                                                                                                                                                                                                                                                                                                                                                                                                                                                                                                                                                                 |
|------------------|---------------------------------------------------------------------------------------------------------------------------------------------------------------------------------------------------------------------------------------------------------------------------------------------------------------------------------------------------------------------------------------------------------------------------------------------------------------------------------------------------------------------------------------------------------------------------------------------------------------------------------------------------------------------------------------------------------------------------------------------------------------------------------------------------------------------------------------------------------------------------------------|-------------------------------------------------------------------------------------------------------------------------------------------------------------------------------------------------------------------------------------------------------------------------------------------------------------------------------------------------------------------------------------------------------------------------------------------------------------------------------------------------------------------------------------------------------------------------------------------------------------------------------------------------------------------------------------------------------------------------------------------------------------------------------------------------|
| ε-proteobacteria | <i>Campylobacter concisus</i><br><i>Helicobacter</i> sp.                                                                                                                                                                                                                                                                                                                                                                                                                                                                                                                                                                                                                                                                                                                                                                                                                              | water, animal associated<br>water, soil, animal associated, acidotolerant                                                                                                                                                                                                                                                                                                                                                                                                                                                                                                                                                                                                                                                                                                                       |
| γ-proteobacteria | <i>Acinetobacter baumannii</i><br><i>Acinetobacter calcoaceticus</i><br><i>Acinetobacter</i> sp. QT15<br>endosymbiont of arthropod<br><i>Enhydrobacter</i> sp. KB3-12<br><i>Frateuria</i> sp.<br>gamma proteobacterium enrichment<br>culture clone BP44-5<br><i>Haemophilus haemolyticus</i><br><i>Halomonas boliviensis</i><br><i>Halomonas</i> sp. 2029<br><i>Halomonas</i> sp. AS-11<br><i>Halomonas</i> sp. G5 1-2<br><i>Halomonas</i> sp. NY93B<br><i>Halomonas</i> sp.<br><i>Klebsiella</i> sp. C611<br><i>Methylophaga</i> sp.<br><i>Moraxella bovoculi</i><br><i>Moraxella osloensis</i><br>proteobacterium symbiont<br><i>Pseudoalteromonas</i> sp. Ld19<br><i>Pseudomonas aeruginosa</i><br><i>Pseudomonas asplenii</i><br><i>Pseudomonas panipatensis</i><br><i>Pseudomonas putida</i><br><i>Pseudomonas</i> sp. 14III/A01/008<br><i>Pseudomonas cf. stutzeri</i> V4.MO.16 | soil, water<br>soil, animal intestines<br>soil, water, animal associated<br>arthropod associated<br>freshwater lake<br>soil, plant associated, animal associated<br>marine<br>soil, water, wastewater, animal associated<br>soil, alkalitolerant, halophilic<br>saltern, salt lake, halophilic<br>marine Arctic, halophilic<br>salt lake, halophilic<br>marine Arctic, halophilic, psychrotolerant<br>marine, halophilic<br>soil, water, animal associated, plant associated<br>marine, rock surfaces, halophilic<br>soil, dust, animal associated<br>symbiont of nematode<br>isolated from arthropod<br>deep-sea marine, psychrophilic<br>soil, water, animal associated, plant associated<br>water, plant associated<br>soil<br>soil, water<br>alpine glacier<br>soil, water, denitrification |

|  |                                                                                                                                                                                                                                                                                                                                                                                                                                                                                                                                                                                                                                                                                                                                                                                                                                                                                                                                                                                                                                                                            |                                                                                                                                                                                                                                                                                                                                                                                                                                                                                                                                                                                                                                                                                                                                                                                                                                                                                                                                                                                                                                        |
|--|----------------------------------------------------------------------------------------------------------------------------------------------------------------------------------------------------------------------------------------------------------------------------------------------------------------------------------------------------------------------------------------------------------------------------------------------------------------------------------------------------------------------------------------------------------------------------------------------------------------------------------------------------------------------------------------------------------------------------------------------------------------------------------------------------------------------------------------------------------------------------------------------------------------------------------------------------------------------------------------------------------------------------------------------------------------------------|----------------------------------------------------------------------------------------------------------------------------------------------------------------------------------------------------------------------------------------------------------------------------------------------------------------------------------------------------------------------------------------------------------------------------------------------------------------------------------------------------------------------------------------------------------------------------------------------------------------------------------------------------------------------------------------------------------------------------------------------------------------------------------------------------------------------------------------------------------------------------------------------------------------------------------------------------------------------------------------------------------------------------------------|
|  | <p><i>Pseudomonas stutzeri</i><br/> Pseudomonadaceae bacterium IZ2<br/> <i>Psychrobacter faecalis</i><br/> <i>Psychrobacter frigidicola</i><br/> <i>Pseudomonas fluorescens</i><br/> <i>Psychrobacter immobilis</i><br/> <i>Pseudomonas</i> sp.<br/> <i>Pseudomonas</i> sp. 47<br/> <i>Pseudomonas</i> sp. 7325<br/> <i>Pseudomonas</i> sp. B6_2008_<br/> <i>Pseudomonas</i> sp. BSi20432<br/> <i>Pseudomonas</i> sp. enrich. culture clone 13.1<br/> <i>Pseudomonas</i> sp. Enrich. culture clone 23.2<br/> <i>Pseudomonas</i> sp. SCT<br/> <i>Pseudomonas</i> sp. SU19<br/> <i>Pseudomonas</i> sp. SY6<br/> <i>Pseudomonas</i> sp. WW6<br/> <i>Pseudomonas</i> sp. ZR1-10<br/> <i>Pseudomonas stutzeri</i><br/> <i>Pseudomonas xanthomarina</i><br/> <i>Psychrobacter frigidicola</i><br/> <i>Psychrobacter maritimus</i><br/> <i>Pseudomonas mendocina</i><br/> <i>Psychrobacter pulmonis</i><br/> <i>Psychrobacter</i> sp. Air226<br/> <i>Psychrobacter</i> spp.<br/> <i>Shigella</i> sp.<br/> <i>Stenotrophomonas</i> sp. I_B14<br/> <i>Xanthomonas fragariae</i></p> | <p>soil, water, denitrification<br/> soil, water<br/> soil, water, animal associated<br/> orthinogenic soil, Antarctica, psychrophilic<br/> soil, water, plant associated<br/> soil, water, fish associated, psychrophilic<br/> soil, water<br/> soil, animal associated, plant associated<br/> Antarctica deep sea sediment<br/> soil<br/> sediment<br/> soil, Ross Island, Antarctica<br/> glacial ice, Svalbard<br/> marine sediment<br/> sediment<br/> estuary, arsenite efflux pump<br/> soil, plant associated<br/> soil, plant associated<br/> soil, animal associated<br/> isolated from marine ascidian (tunicate), cold ocean<br/> marine Antarctica, halophilic, psychrophilic<br/> coastal sea ice, psychrotolerant<br/> soil, aquifer, denitrification<br/> sediments, seawater, permafrost, animal associated<br/> soil, sea ice, fish gills and skin, Antarctic<br/> marine, psychrophilic, halophilic<br/> water, lakes, rivers, oceans<br/> soil, plant associated, animal associated<br/> soil, plant associated</p> |
|--|----------------------------------------------------------------------------------------------------------------------------------------------------------------------------------------------------------------------------------------------------------------------------------------------------------------------------------------------------------------------------------------------------------------------------------------------------------------------------------------------------------------------------------------------------------------------------------------------------------------------------------------------------------------------------------------------------------------------------------------------------------------------------------------------------------------------------------------------------------------------------------------------------------------------------------------------------------------------------------------------------------------------------------------------------------------------------|----------------------------------------------------------------------------------------------------------------------------------------------------------------------------------------------------------------------------------------------------------------------------------------------------------------------------------------------------------------------------------------------------------------------------------------------------------------------------------------------------------------------------------------------------------------------------------------------------------------------------------------------------------------------------------------------------------------------------------------------------------------------------------------------------------------------------------------------------------------------------------------------------------------------------------------------------------------------------------------------------------------------------------------|

|                                                                                               |                                                                                                                                                                                                           |                                                                                                                                                                                    |
|-----------------------------------------------------------------------------------------------|-----------------------------------------------------------------------------------------------------------------------------------------------------------------------------------------------------------|------------------------------------------------------------------------------------------------------------------------------------------------------------------------------------|
| Oligoflexia                                                                                   | <i>Bacteriovorax</i> sp.<br><i>Bacteriovorax</i> sp. EPC3                                                                                                                                                 | marine<br>marine, Antarctica coast                                                                                                                                                 |
| Spirochaete                                                                                   | <i>Brachyspira pilosicoli</i>                                                                                                                                                                             | water, feces, animal associated                                                                                                                                                    |
| Verrumicrobia                                                                                 | <i>Pedosphaera parvula</i>                                                                                                                                                                                | soil                                                                                                                                                                               |
| <b>EUKARYA</b><br>Alveolata<br><br>Animalia<br>Arthropoda<br><br><br>Mollusca<br><br>Rotifera | <i>Perkinsus marinus</i><br><br><i>Daphnia pulex</i><br><i>Entomobrya dorsosignata</i><br><i>Lepidocyrtus</i> sp.<br><i>Sinella curviseta</i><br><br><i>Nutricola tantilla</i><br><br><i>Adineta vaga</i> | marine bivalve pathogen<br><br>water flea, crustacean<br>leaf litter, springtail<br>wet soils, springtail<br>wet soils, springtail<br><br>deep water marine clam<br><br>freshwater |
| Archaeplastida<br>Chlorophyta                                                                 | <i>Microspora stagnorum</i><br><i>Pseudendoclonium akinetum</i><br><i>Pyramimonas tetraerhynchus</i><br><i>Zygnematales</i> sp. M3006                                                                     | freshwater<br>freshwater, terrestrial<br>freshwater<br>freshwater                                                                                                                  |

|                      |                                                                                                                                                                                                                                                                                                                                                                                                                                                                                                                                                          |                                                                                                                                                                                                                                                                                                                                                                                                                                                                                                                                             |
|----------------------|----------------------------------------------------------------------------------------------------------------------------------------------------------------------------------------------------------------------------------------------------------------------------------------------------------------------------------------------------------------------------------------------------------------------------------------------------------------------------------------------------------------------------------------------------------|---------------------------------------------------------------------------------------------------------------------------------------------------------------------------------------------------------------------------------------------------------------------------------------------------------------------------------------------------------------------------------------------------------------------------------------------------------------------------------------------------------------------------------------------|
| Streptophyta         | A few angiosperm species<br>Two gymnosperm species                                                                                                                                                                                                                                                                                                                                                                                                                                                                                                       | likely pollen<br>likely pollen, both native to Himalayas                                                                                                                                                                                                                                                                                                                                                                                                                                                                                    |
| Ciliophora           | <i>Uroleptus pisces</i>                                                                                                                                                                                                                                                                                                                                                                                                                                                                                                                                  | freshwater, planktonic                                                                                                                                                                                                                                                                                                                                                                                                                                                                                                                      |
| Excavata<br>Percozoa | <i>Naegleria gruberi</i>                                                                                                                                                                                                                                                                                                                                                                                                                                                                                                                                 | wet soil, freshwater, animal pathogen                                                                                                                                                                                                                                                                                                                                                                                                                                                                                                       |
| Trypanosoma          | <i>Trypanosoma cruzi</i>                                                                                                                                                                                                                                                                                                                                                                                                                                                                                                                                 | animal parasite                                                                                                                                                                                                                                                                                                                                                                                                                                                                                                                             |
| Fungi<br>Ascomycota  | <i>Articulospora tetracladia</i><br><i>Boeremia exigua</i><br><i>Candida ontarioensis</i><br><i>Candida orthopsilosis</i><br><i>Cyberlindnera jadinii</i><br><i>Davidiella tassiana</i><br><i>Lecanora intumescens</i><br><i>Leptosphaeria doliolum</i><br><i>Mycosphaerellaceae</i> sp. CPC 12304<br><i>Nigrospora</i> sp. SGSGf13<br><i>Passalora perplexa</i><br><i>Peyronellaea glomerata</i><br><i>Phaeodothis winteri</i><br><i>Phaeosphaeria avenaria</i><br><i>Phaeosphaeria nodorum</i><br><i>Phaeosphaeria</i> sp. UZK<br><i>Phoma infossa</i> | aquatic<br>soil, plant associated<br>soil, plant associated<br>soil, animal associated, gut<br>soil, plant associated, animal associated<br>soil, plant associated (anamorph: <i>Cladosporium herbarum</i> )<br>rock, lichen associated<br>soil, plant associated<br>soil, plant associated<br>soil, plant associated<br>soil, plant associated<br>soil, marine, plant associated<br>soil, plant associated<br>soil, plant associated<br>soil, plant associated<br>soil, plant associated<br>soil, air, plant associated, animal associated |

|                                        |                                                                                                                                                                                                                                                                                                                                                                                                                                                                                                                                                           |                                                                                                                                                                                                                                                                                                                                                                                                                                                                                                                                                                     |
|----------------------------------------|-----------------------------------------------------------------------------------------------------------------------------------------------------------------------------------------------------------------------------------------------------------------------------------------------------------------------------------------------------------------------------------------------------------------------------------------------------------------------------------------------------------------------------------------------------------|---------------------------------------------------------------------------------------------------------------------------------------------------------------------------------------------------------------------------------------------------------------------------------------------------------------------------------------------------------------------------------------------------------------------------------------------------------------------------------------------------------------------------------------------------------------------|
| <p>Basidiomycota</p> <p>Zygomycota</p> | <p><i>Phoma macrostoma</i><br/> <i>Phoma vasinfecta</i><br/> <i>Phoma viburnicola</i><br/> <i>Saccharomyces cerevisiae</i><br/> <i>Stagonosporopsis rudbeckiae</i><br/> <i>Stagonosporopsis valerianellae</i><br/> <i>Verticillium dahliae</i></p> <p><i>Cryptococcus neoformans</i><br/> <i>Cryptococcus</i> sp. ATT123<br/> <i>Dioszegia rishiriensis</i><br/> <i>Malassezia pachydermatis</i><br/> <i>Rhodotorula lamellibrachiae</i><br/> <i>Sakaguchia dacryoidea</i></p> <p><i>Sistotrema brinkmannii</i></p> <p><i>Gongronella</i> sp. xt-2009</p> | <p>soil, air, plant associated<br/> soil, nematode associated, plant associated<br/> soil, air, plant associated, animal associated<br/> soil, water, plant associated<br/> soil, plant associated<br/> soil, plant associated<br/> soil, plant associated</p> <p>soil, animal associated, plant associated<br/> soil<br/> soil<br/> soil, animal associated<br/> marine animal associated, 1100 m depth<br/> marine, alkalitolerant, Antarctic seawater 4000 m, glacial meltwater<br/> soil, plant associated, fungus associated</p> <p>soil, plant associated</p> |
| <p>Heterokonta</p>                     | <p><i>Aphanomyces euteiches</i><br/> <i>Botrydiopsis constricta</i><br/> <i>Halosiphon tomentosus</i><br/> <i>Stephanodiscus</i> sp. FHTC11<br/> <i>Stephanodiscus</i> sp. KHR001<br/> uncultured labyrinthulid</p>                                                                                                                                                                                                                                                                                                                                       | <p>freshwater, plant associated<br/> terrestrial, Antarctica<br/> marine<br/> freshwater diatom, lake, river<br/> freshwater diatom, reservoir<br/> marine slime nets</p>                                                                                                                                                                                                                                                                                                                                                                                           |

**Table S4. Characteristics of organisms in the eastern portion of the embayment.** Taxa in the accretion ice representing the eastern section of the embayment (3,585 m section), where characteristics could be determined.

| <b>Taxonomy</b>                    | <b>Species/Strain/Isolate</b>                                                                                                           | <b>Characteristics (habitat, habit, functions)</b>                                                                                              |
|------------------------------------|-----------------------------------------------------------------------------------------------------------------------------------------|-------------------------------------------------------------------------------------------------------------------------------------------------|
| <b>BACTERIA</b><br>Actinobacteria  | <i>Microbacterium</i> sp.                                                                                                               | soil, water                                                                                                                                     |
| Bacteroidetes                      | <i>Arachidicoccus</i> sp.<br><i>Chitinophaga caeni</i><br><i>Chitinophaga</i> sp.<br><i>Salinibacter ruber</i>                          | soil, plant associated<br>soil, sediment<br>soil<br>aquatic, halophilic                                                                         |
| Cyanobacteria                      | <i>Phormidium</i> sp.                                                                                                                   | aquatic                                                                                                                                         |
| Firmicutes                         | <i>Bacillus mojavensis</i><br><i>Bacillus</i> sp.<br><i>Bacillus subtilis</i><br><i>Bacillus thuringiensis</i><br><i>Bhargavaea</i> sp. | desert soil<br>soil, thermotolerant<br>soil<br>soil, aquatic, arthropod associated, animal gastrointestinal<br>deep sea sediments, coastal sand |
| Planctomyces                       | <i>Planctomyces</i> sp.                                                                                                                 | marine                                                                                                                                          |
| Proteobacteria<br>α-proteobacteria | <i>Phycorickettsia trachydisci</i>                                                                                                      | algal endosymbiont                                                                                                                              |
| β-proteobacteria                   | <i>Achromobacter insolitus</i>                                                                                                          | soil, water, animal associated                                                                                                                  |

|                                          |                                          |
|------------------------------------------|------------------------------------------|
| <i>Achromobacter</i> sp.                 | soil                                     |
| <i>Achromobacter xylosoxidans</i>        | wet soil, aquatic, animal associated     |
| <i>Acidovorax cattleyae</i>              | soil, plant associated                   |
| <i>Acidovorax citrulli</i>               | soil, plant associated                   |
| <i>Acidovorax</i> sp.                    | soil                                     |
| <i>Advenella kashmirensis</i>            | soil                                     |
| <i>Advenella</i> sp.                     | soil                                     |
| <i>Alcaligenes aquatilis</i>             | salt marsh sediments                     |
| <i>Aquabacterium olei</i>                | soil, water                              |
| <i>Azoarcus</i> sp.                      | soil, freshwater                         |
| <i>Bordetella parapertussis</i>          | airborne, soil, animal associated        |
| <i>Bordetella pertussis</i>              | airborne, soil, animal associated        |
| <i>Crenobacter</i> sp.                   | soil, water                              |
| <i>Dechloromonas hortensis</i>           | water, karst cave                        |
| <i>Dechloromonas</i> sp.                 | soil, water                              |
| <i>Delftia</i> sp.                       | soil, freshwater, crustaceans            |
| <i>Janthinobacterium agaricidamnosum</i> | soil, psychrotolerant, Antarctic         |
| <i>Limnohabitans</i> sp.                 | freshwater, planktonic                   |
| <i>Melaminivora</i> sp.                  | soil, sediment                           |
| <i>Methylopumilus planktonicus</i>       | freshwater, planktonic, methylotrophic   |
| <i>Methylophilus</i> sp.                 | soil, plant associated                   |
| <i>Methylopumilus turicensis</i>         | freshwater, planktonic, methylotrophic   |
| <i>Methylotenera mobilis</i>             | freshwater, planktonic, methylotrophic   |
| <i>Ottowia oryzae</i>                    | soil, sediment, plant associated         |
| <i>Pelomonas</i> sp.                     | aquatic                                  |
| <i>Polaromonas glacialis</i>             | alpine glacier cryoconite, psychrophilic |
| <i>Pusillimonas ginsengisoli</i>         | soil                                     |
| <i>Pusillimonas</i> sp.                  | soil, mud, sand, psychrotolerant         |
| <i>Rhizobacter gummiphilus</i>           | soil, plant associated                   |
| <i>Simplicispira suum</i>                | air, sediment, dust                      |
| <i>Undibacterium</i> sp.                 | freshwater, soil                         |



|                                                    |                                                                                                                                                                                                                                                                                                                                                                                                                                                                                                                                                                                                                                                                                         |                                                                                                                                                                                                                                                                                                                                                                                                                                                                                                                                                                                                                                                                                                                                                                                             |
|----------------------------------------------------|-----------------------------------------------------------------------------------------------------------------------------------------------------------------------------------------------------------------------------------------------------------------------------------------------------------------------------------------------------------------------------------------------------------------------------------------------------------------------------------------------------------------------------------------------------------------------------------------------------------------------------------------------------------------------------------------|---------------------------------------------------------------------------------------------------------------------------------------------------------------------------------------------------------------------------------------------------------------------------------------------------------------------------------------------------------------------------------------------------------------------------------------------------------------------------------------------------------------------------------------------------------------------------------------------------------------------------------------------------------------------------------------------------------------------------------------------------------------------------------------------|
| <p>δ-proteobacteria</p> <p>γ-proteobacteria</p>    | <p><i>Variovorax</i> sp.<br/><i>Zoogloea</i> sp.</p> <p><i>Pelobacter</i> sp.</p> <p><i>Baumannia cicadellinicola</i><br/><i>Klebsiella</i> sp.<br/><i>Marinimicrobium</i> sp.<br/><i>Nitrincola alkalilacustris</i><br/><i>Nitrincola schmidtii</i><br/><i>Pantoea</i> sp.<br/><i>Pseudocitrobacter anthropic</i><br/><i>Pseudomonas bohemica</i><br/><i>Pseudomonas brassicacearum</i><br/><i>Pseudomonas brenneri</i><br/><i>Pseudomonas marginalis</i><br/><i>Pseudomonas monteilii</i><br/><i>Pseudomonas putida</i><br/><i>Pseudomonas savastanoi</i><br/><i>Pseudomonas</i> sp.<br/><i>Pseudomonas thivervalensis</i><br/><i>Psychrobacter</i> sp.</p> <p><i>Sodalis</i> sp.</p> | <p>soil, aquatic<br/>sediments</p> <p>marine sediments</p> <p>endosymbiont of arthropod<br/>soil, water, plant associated, animal associated<br/>soil, aquatic, tidal flat sediment, alkaliphilic. halotolerant<br/>soil, aquatic, alkaliphilic, halotolerant<br/>soil, aquatic, alkaliphilic, halotolerant<br/>soil, freshwater, animal associated, plant associated<br/>animal gastrointestinal<br/>soil, animal associated<br/>soil, plant associated<br/>water<br/>soil, plant associated<br/>soil, animal associated<br/>soil, water, plant associated<br/>moist soil, airborne, plant associated<br/>soil, plant associated, animal associated<br/>soil, plant associated<br/>aquatic, psychrophilic, psychrotolerant, halotolerant,<br/>Antarctica<br/>endosymbiont of arthropod</p> |
| <p><b>EUKARYA</b><br/>Alveolata<br/>Ciliophora</p> | <p><i>Corlissina maricaensis</i><br/><i>Trachelolophos quadrinucleatus</i></p>                                                                                                                                                                                                                                                                                                                                                                                                                                                                                                                                                                                                          | <p>ciliated protozoan, brackish water<br/>protozoan, marine sandy intertidal</p>                                                                                                                                                                                                                                                                                                                                                                                                                                                                                                                                                                                                                                                                                                            |

|                                                |                                                                                                                                                                                                                                                                                                                                                                                          |                                                                                                                                                                                                                                                                                                               |
|------------------------------------------------|------------------------------------------------------------------------------------------------------------------------------------------------------------------------------------------------------------------------------------------------------------------------------------------------------------------------------------------------------------------------------------------|---------------------------------------------------------------------------------------------------------------------------------------------------------------------------------------------------------------------------------------------------------------------------------------------------------------|
| Amoebozoa                                      | <i>Diffugia bacilliarum</i><br><i>Diffugia hiraethogii</i><br><i>Diffugia lanceolata</i><br><i>Diffugia oblonga</i>                                                                                                                                                                                                                                                                      | freshwater<br>freshwater<br>freshwater<br>freshwater marsh                                                                                                                                                                                                                                                    |
| Animalia<br>Arthropoda<br><br>Choanoflagellata | <br><br><br>uncultured Choanoflagellida                                                                                                                                                                                                                                                                                                                                                  | <br><br><br>unicellular animal, marine, brackish water, freshwater                                                                                                                                                                                                                                            |
| Fungi<br>Ascomycota                            | <i>Arthrocatena tenebrio</i><br><i>Ascochyta sorghi</i><br><i>Boeremia exigua</i><br><i>Didymella macrostoma</i><br><i>Epicoccum nigrum</i><br><i>Epicoccum sorghinum</i><br><i>Neoascochyta graminicola</i><br><i>Nothophoma quercina</i><br><i>Phoma</i> sp.<br><i>Rachicladosporium eucalypti</i><br><i>Readeriellipsoidis fuscoporiae</i><br><i>Stagonosporopsis cucurbitacearum</i> | rock inhabiting<br>soil, plant associated<br>soil, plant associated |
| Heterokonta (diatoms)                          | <i>Phaeodactylum stadleri</i>                                                                                                                                                                                                                                                                                                                                                            | marine diatom                                                                                                                                                                                                                                                                                                 |
| Stramenopile                                   | <i>Chrysopodocystis socialis</i>                                                                                                                                                                                                                                                                                                                                                         | marine                                                                                                                                                                                                                                                                                                        |

**Table S5. Characteristics of organisms in the western main basin of Lake Vostok.** Taxa in the accretion ice representing the western edge of the main basin (3,606 + 3,621 m sections), where characteristics could be determined. Data from refs. [1,2].

| Taxonomy                                                   | Species/Strain/Isolate                                                                                                                                                                                                                                                                                                                                       | Characteristics (habitat, habit, functions)                                                                                                                |
|------------------------------------------------------------|--------------------------------------------------------------------------------------------------------------------------------------------------------------------------------------------------------------------------------------------------------------------------------------------------------------------------------------------------------------|------------------------------------------------------------------------------------------------------------------------------------------------------------|
| <b>BACTERIA</b><br>Actinobacteria                          | <i>Clavibacter michiganensis</i><br><i>Micrococcus</i> sp.<br><i>Mycobacterium marinum</i>                                                                                                                                                                                                                                                                   | Soil, plant associated<br>soil, water<br>marine, freshwater, fish associated                                                                               |
| Firmicutes                                                 | <i>Bacillus clausii</i><br><i>Lactococcus lactis</i><br><i>Sporosarcina globispora</i><br><i>Staphylococcus</i> sp.                                                                                                                                                                                                                                          | soil<br>animal associated, plant associated<br>soil, river water, psychrophilic<br>soil, halotolerant, desiccation resistant                               |
| Proteobacteria<br>α-proteobacteria<br><br>β-proteobacteria | <i>Brevundimonas diminuta</i><br><i>Brevundimonas</i> sp. AKB-2008-KU11<br><i>Mycoplana</i> sp.<br><i>Subaequorebacter tamlense</i><br><br><i>Burkholderia cepacia</i><br><i>Burkholderia</i> sp. CV4.4.3R1<br><i>Comamonas</i> sp. BF-3<br><i>Delftia acidovorans</i><br><i>Herbaspirillum</i> sp.<br><i>Lautropia mirabilis</i><br><i>Thiobacillus</i> sp. | Soil, water<br>soil, freshwater<br>soil<br>beach sediment<br><br>soil, water<br>soil<br>soil<br>soil, rock<br>soil<br>animal associated<br>soil, autotroph |

|                                                                 |                                                                                                                                                                                                                                                                                                                                            |                                                                                                                                                                                                                                                              |
|-----------------------------------------------------------------|--------------------------------------------------------------------------------------------------------------------------------------------------------------------------------------------------------------------------------------------------------------------------------------------------------------------------------------------|--------------------------------------------------------------------------------------------------------------------------------------------------------------------------------------------------------------------------------------------------------------|
| <p><math>\gamma</math>-proteobacteria</p>                       | <p><i>Citrobacter</i> sp.<br/> <i>Enterobacter</i> sp.<br/> <i>Escherichia</i> sp.<br/> <i>Moraxella bovoculi</i><br/> <i>Pseudomonas putida</i><br/> <i>Pseudomonas</i> sp.<br/> rainbow trout intestinal bacterium T1<br/> <i>Rheinheimera</i> sp.<br/> <i>Shigella</i> sp.<br/> <i>Vibrio</i> sp.<br/> <i>Xanthomonas fragariae</i></p> | <p>soil, freshwater, sediment<br/> animal gut<br/> animal gut, soil, water<br/> animal associated<br/> soil<br/> soil, freshwater<br/> animal gut<br/> lake water<br/> animal gut, soil, water<br/> freshwater lake sediment<br/> soil, plant associated</p> |
| <p>Undetermined</p>                                             | <p>lobster gut bacterium ABHa3</p>                                                                                                                                                                                                                                                                                                         | <p>crustacean associated</p>                                                                                                                                                                                                                                 |
| <p><b>EUKARYA</b></p> <p>Archaeplastida</p> <p>Streptophyta</p> | <p>Two sequences from two plan families</p>                                                                                                                                                                                                                                                                                                | <p>likely pollen</p>                                                                                                                                                                                                                                         |
| <p>Fungi<br/> Ascomycota</p>                                    | <p><i>Babjeviella inositovora</i><br/> <i>Candida tropicalis</i><br/> <i>Cladosporium cladosporioides</i><br/> <i>Coniosporium apollinis</i><br/> <i>Cyathicula microspore</i><br/> <i>Davidiella tassiana</i><br/> <i>Medeolaria farlowii</i><br/> <i>Millerozyma farinose</i></p>                                                        | <p>soil<br/> soil, water, animal gut, halotolerant<br/> psychrophilic, desiccation resistant, soil, water, air<br/> rock (marble)<br/> soil, water<br/> soil, plant associated<br/> soil, water, plant associated<br/> halotolerant, osmotolerant</p>        |

|               |                                  |                                |
|---------------|----------------------------------|--------------------------------|
| Basidiomycota | <i>Ogataea thermomethanolica</i> | thermotolerant, methylotrophic |
|               | <i>Phaeosphaeria avenaria</i>    | soil, plant associated         |
|               | <i>Bullera taiwanensis</i>       | soil, plant associated         |
|               | <i>Geastrum sessile</i>          | soil                           |

**Table S6 Species and isolates listed by characteristics.** Characteristics (where they could be determined) and isolate sources for species closest to those in the Vostok ice core sections, with taxon designations.

**Basal (3,501 + 3,520 m)**

Marine estuary – *Mycobacterium* sp. (Actinobacteria)

Deep ocean – *Euzebya* sp. (Actinobacteria)

Antarctic quartz – *Aequorivita sublithinicola* (Actinobacteria)

Alpine glacier cryoconite – *Pedobacter cryoconitis* (Bacteroidetes)

Animal gastrointestinal – *Balutia coccoides* (Firmicutes), *Caecibacter massiliensis*

(Firmicutes), *Lactobacillus plantarum* (Firmicutes), *Megasphaera hexanoica*

(Firmicutes), *Negativeicoccus massiliensis* (Firmicutes), *Enterobacter* sp. (Gammaproteobacteria), *Cellvibrio* sp.

(Gammaproteobacteria)

Animal pathogen – *Trypanosoma* sp. (Excavata)

Annelids – *Pseudarcicella* sp. (Bacteroidetes)

Antarctica – *Paenisporosarcina* sp. (Firmicutes)

Antarctic lichen – *Hymenobacter* sp. (Bacteroidetes)

Antarctic saline lake - *Flavobacterium* sp. (Bacteroidetes)

Antarctic soil – *Sphingobacterium* sp. (Bacteroidetes)

Apicomplexa – 3 *Plasmodium* species

Arsenic metabolism– *Acidiphilium miltivorum* (Alphaproteobacteria)

Arthropod symbiont – *Buchnera aphidicola* (Gammaproteobacteria)

Brown algae-associated – *Mariniflexile* sp. (Bacteroidetes)

Chlorophyta (green algae) – 7 species (Antarctic, aquatic, marine, soil)

Chromium metabolism - *Acidiphilium cryptum* (Alphaproteobacteria)

Diatoms (Heterokonta) – 12 species (aquatic and marine)

Diatom-associated – *Kordia* sp. (Bacteroidetes)

Euglenozoa – 6 species (aquatic, marine, soil)

Fish associated– *Flavobacterium branchiophilum* (Bacteroidetes), *Flavobacterium*

*columnare* (Bacteroidetes), *Flavobacterium psychrophilum* (Bacteroidetes), *Flavobacterium* sp. (Bacteroidetes), *Raoultella planticola* (Betaproteobacteria)

Fish/Amphibian associated – *Elizabethkinia meningosepta* (Bacteroidetes)

Fungi – 3 species (Ascomycota)

Glacier (Tibet) – *Massilia glaciei* (Betaproteobacteria)

Halophilic/halotolerant - *Dunaliella salina* (Chlorophyta), *Halorubrum trapanicum*

(Archaea)

Haptophyte - *Emiliana huxleyi* (marine coccolithophore)

Hydrothermal vent – *Lysobacter* sp. (Gammaproteobacteria)

Iron metabolism – *Acidiphilium cryptum* (Alphaproteobacteria), *Ferribacterium* sp.

(Betaproteobacteria), *Ferriphaselus amnicola* (Betaproteobacteria),

Marine hydrothermal vent – *Hippea maritima* (Deltaproteobacteria)

Mussel farm - *Echinicola vientamensis* (Bacteroidetes)



Pacific oyster – *Flavobacterium crassostreae* (Bacteroidetes)

Peat bog/permafrost – *Paludisphaera borealis* (Planctomycete)

Penguin feces - *Flavobacterium kingsejongi* (Bacteroidetes)

Psychrophilic/psychrotolerant - *Cryobacterium* sp. (Actinobacteria), *Hathewayia*

*histolytica* (Actinobacteria), *Pedobacter cryoconitis* (Bacteroidetes), *Paenisporosarcina* sp. (Firmicutes), *Rhodiferax* sp.

(Betaproteobacteria), *Pseudoalteromonas* sp. (Gammaproteobacteria)

Radiation tolerant – *Kineococcus radiotolerans* (Betaproteobacteria)

Rock – *Delftia acidovorans* (Betaproteobacteria), *Massilia buxea* (Betaproteobacteria)

Sand dollar associated – *Cyclobacterium marinum* (Bacteroidetes)

Sea squirt associated – *Pseudomonas xanthomarina* (Gammaproteobacteria)

Sea urchin associated – *Echinicola strongylocenroti* (Bacteroidetes)

Seaweed associated – *Gilvimarinus* sp. (Gammaproteobacteria)

Sulfur metabolism – *Desulfococcus multivorans* (Betaproteobacteria), *Sulfuriferula*

*thiophila* (Betaproteobacteria), *Desulfurella acetovorans* (Deltaproteobacteria), *Desulfobacterium* sp. (Deltaproteobacteria),  
*Hippea maritima* (Deltaproteobacteria)

Thermophilic/thermotolerant - *Thauera hydrothermalis* (Betaproteobacteria),

*Desulfurella acetivorans* (Delta), *Hydrogenophilus thermoluteolus* (Hydrogenophilalia)

Tidal flat - *Flavobacterium* sp. (Bacteroidetes)

Tidal flat – *Gramella* sp. (Bacteroidetes)

Wolfram (manganese tungstate) – *Massilia pudita* (Betaproteobacteria)

### **Western section of embayment (3,540 + 3,569 m)**

Animal gastrointestinal - *Brachybacterium* sp. (Actinobacteria), *Shigella sonnei*

(Gammaproteobacteria)

Animal pathogen – *Trypanosoma* sp. (Excavata)

Chlorophyta (green alga) - *Monoraphidium neglectum* (Archaeplastida)

Deep subsurface pyritic rock - *Tessaracoccus* sp. (Actinobacteria)

Fungi - *Metarhizium brunneum* (Ascomycota)

Halophilic/halotolerant - *Halobacterium salinarum* (Archaea), *Brachybacterium saurashtrense* (Actinobacteria)

Haptophyte associated - *Methyloversatilis* sp. (Betaproteobacteria)

Hot spring - *Azospirillum* sp. (Alphaproteobacteria)

Iron metabolism - *Acidithiobacillus ferrooxidans* (Actinoproteobacteria)

Marine sponge - *Micromonospora echinofusca* (Actino), *Streptomyces* sp.  
(Actinobacteria)

Psychrophilic/psychrotolerant - *Acidithiobacillus ferrivorans* (Acidithiobacillia)

Sandstone - *Auraticoccus monumenti* (Actinobacteria)

Sulfur metabolism - *Thiobacillus denitrificans* (Betaproteobacteria), *Sulfurifustis variabilis* (Gammaproteobacteria)

Thermophilic/thermotolerant - *Gordonia* sp. (Actinobacteria)

Volcanic soil - *Marmoricola scoriae* (Actinobacteria)

### **Middle Section of Embayment (3,563 + 3,585 m)**

Alpine glacier - *Pseudomonas* sp. (Gammaproteobacteria)

Alpine glacier cryoconite - *Klugiella* sp. (Actinobacteria)

Ancient subsurface sulfidic water - *Caldimonas manganoxidans* (Betaproteobacteria)

Andes lake - *Calothrix* sp. (Cyanobacteria)

Animal gastrointestinal - *Janibacter anopheles* (Actinobacteria), *Parascardovia*

*denticolens* (Actinobacteria), *Bacteroides coprocola* (Bacteroidetes), *Bacteroides* sp. (Bacteroidetes), *Mucispirillum schaedleri*

(Deferribacteres), *Streptococcus equinus* (Firmicutes), *Acinetobacter calcoaceticus* (Gammaproteobacteria), *Brachyspira pilosicoli*

(Spirochaete), *Candida orthopsilosis* (Ascomycota)

Animal parasite - *Trypanosoma* sp. (Excavata)

Antarctica – rock crust cyanobacterium, *Planococcus maitriensis* (Firmicutes),

*Paracoccus* sp. (Alphaproteobacteria), *Psychrobacter frigidicola* (Gammaproteobacteria), *Psychrobacter* sp.

(Gammaproteobacteria)

Antarctic coast - *Bacteriovorax* sp. (Oligoflexia)

Antarctic deep sea (4000 m) - *Sakaguchia dacryoidea* (Basidiomycota)

Antarctic deep sea sediment - *Pseudomonas* sp. (Gammaproteobacteria)

Antarctic lake - *Flavobacterium* sp. (Bacteroidetes)

Antarctic marble - *Deinococcus marmoris* (Deinococcus-Thermus)

Arctic - *Halomonas* sp. (Gammaproteobacteria)

Deep sea - *Pseudoalteromonas* sp. (Gammaproteobacteria)

Deep sea sediment - *Geobacillus kaustophilus* (Firmicutes)

Fish gastrointestinal - *Mobilicoccus pelagius* (Actinobacteria), *Flavobacterium* sp.

(Bacteroidetes)

Fish liver - *Bacillus horikoshii* (Firmicutes)

Fish/crustaceans - *Carnobacterium mobile* (Firmicutes), *Carnobacterium* sp.

(Firmicutes), *Psychrobacter immobilis* (Gammaproteobacteria)

Geothermal hot spring - *Anoxybacillus flavithermus* (Bacteroidetes), *Synechococcus* sp.

(Cyanobacterium), *Thermosynechococcus* sp. (Cyanobacterium)

Glacial ice, Svalbard - *Pseudomonas* sp. (Gammaproteobacteria)

Glacial meltwater - *Sakaguchia dacryoidea* (Basidiomycota)

Glacier - *Planomicrobium koreense* (Firmicutes)

Halophilic/halotolerant - *Flavobacterium* sp. (Bacteroidetes), *Chroococcidiopsis* sp.

(Cyanobacteria), *Gloeocapsa* sp. (Cyanobacteria), *Jeotgalicoccus halotolerans* (Firmicutes), *Jeotgalicoccus* sp. (Firmicutes),

*Marinococcus* sp. (Firmicutes), *Tetragenococcus doogicus* (Firmicutes), *Brevundimonas* sp. (Alphaproteobacteria), *Halomonas*

*boliviensis* (Gammaproteobacteria), *Halomonas* sp. (Gammaproteobacteria), *Methylophaga* sp. (Gammaproteobacteria),

*Psychrobacter* sp. (Gammaproteobacteria)

Diatoms – 6 species, aquatic, marine, Antarctic (Heterokonta)

Himalayan snow - *Rhodobacter changlensis* (Alphaproteobacteria)

Hot spring - *Caldimonas manganoxidans* (Alphaproteobacteria)

Lichen associated - *Deinococcus marmoris* (Deinococcus-Thermus)

Marine Arctic - *Halomonas* sp. (Gammaproteobacteria)

Marine hydrothermal sediment - *Janibacter* sp. (Actinobacteria)

Marine sea hydroid associated - Oscillatoriales (Cyanobacteria)

Marine tunicate associated - *Pseudomonas xanthomarina* (Gammaproteobacteria)

McMurdo Dry Valley, Antarctica - *Arthrobacter flavus* (Actinobacteria)

Psychrophilic/psychrotolerant - *Arthrobacter flavus* (Actinobacteria), *Clavibacter*

*michiganensis* (Actinobacteria), *Subtercola frigoramans* (Actinobacteria), *Sphingobacterium* sp. (Bacteroidetes),

*Chroococcidiopsis* sp. (Cyanobacteria), *Nostoc* sp. (Cyanobacteria), *Deinococcus marmoris* (Deinococcus-Thermus), *Deinococcus*

*radiodurans* (Deinococcus-Thermus), *Bacillus megaterium* (Firmicutes), *Planococcus maitriensis* (Firmicutes), *Planococcus*

*psychrotoleratus* (Firmicutes), *Planococcus* sp. (Firmicutes), *Planomicrobium koreense* (Firmicutes), *Rhodobacter changlensis*

(Alphaproteobacteria), *Polaromonas* sp. (Betaproteobacteria), *Halomonas* sp. (Gammaproteobacteria), *Pseudoalteromonas* sp.

(Gammaproteobacteria), *Psychrobacter frigidicola* (Gammaproteobacteria), *Psychrobacter immobilis* (Gammaproteobacteria),  
*Psychrobacter* sp. (Gammaproteobacteria)

Rock – rock crust cyanobacterium

Ross Island, Antarctica - *Pseudomonas* sp. (Gammaproteobacteria)

Seaweed - *Phycicola gilvus* (Actinobacteria)

Symbiont of nematode - *Moraxella osloensis* (Gammaproteobacteria)

Symbiont of Paramecium - *Caedibacter caryophilus* (Alphaproteobacteria)

Svalbard - *Phormidium* sp. (Cyanobacterium)

Thermal stream - *Caldimonas hydrothermale* (Betaproteobacteria)

Thermophilic/thermotolerant - *Thermobispora bispora* (Actinobacteria), *Anoxybacillus*

*flavithermus* (Bacteroidetes), *Thermosynechococcus* sp. (Cyanobacteria), *Bacillus megaterium* (Firmicutes), *Geobacillus*

*kaustophilus* (Firmicutes), *Lactobacillus fermentum* (Firmicutes), *Lactobacillus helveticus* (Firmicutes), *Streptococcus*

*thermophilus* (Firmicutes), *Caldimonas hydrothermale* (Betaproteobacteria), *Caldimonas manganoxidans* (Betaproteobacteria)

Tibetan plateau lake - *Pedobacter steynii* (Bacteroidetes)



Tibetan plateau soil – *Sphingobacterium* sp. (Bacteroidetes)

**Eastern section of embayment (3,585 m)**

Algal symbiont - *Phycorickettsia trachydisci* (Alphaproteobacteria)

Alpine glacier cryoconite - *Polaromonas glacialis* (Betaproteobacteria)

Animal gastrointestinal - *Bacillus thuringiensis* (Firmicutes)

Antarctica - *Janthinobacterium agaricidamnosum* (Betaproteobacteria), *Psychrobacter*

sp. (Gammaproteobacteria)

Brackish water - *Corlissina maricaensis* (Ciliophora)

Ciliated protozoan - *Corlissina maricaensis* (Ciliophora), *Trachelolophos quadrinucleatus*

(Ciliophora)

Crustacean associated - *Delftia* sp. (Betaproteobacteria)

Cave (karst, water) - *Dechloromonas hortensis* (Betaproteobacteria)

Coastal sand - *Bhargavaea* sp. (Firmicutes)

Deep sea sediment - *Bhargavaea* sp. (Firmicutes)

Endosymbiont of arthropod - *Sodalis* sp. (Gammaproteobacteria)

Freshwater marsh - *Diffflugia oblonga* (Amoebozoa)

Halophilic/halotolerant - *Salinibacter ruber* (Bacteroidetes), *Marinimicrobium* sp.

(Gammaproteobacteria), *Nitrincola alkalilacustris* (Gammaproteobacteria), *Nitrincola schmidtii* (Gammaproteobacteria),

*Psychrobacter* sp. (Gammaproteobacteria)

Marine brackish water - uncultured Choanoflagellida (Choanoflagellata)

Marine diatom - *Phaeodactylum stadleri* (Heterokonta)

Marine sandy intertidal - *Trachelolophos quadrinucleatus* (Ciliophora)

Methylotrophic - *Methylopumilus planktonicus* (Betaproteobacteria), *Methylopumilus*

*turicensis* (Betaproteobacteria), *Methylotenera mobilis* (Betaproteobacteria)

Psychrophilic/psychrotolerant - *Janthinobacterium agaricidamnosum*

(Betaproteobacteria), *Polaromonas glacialis* (Betaproteobacteria), *Pusillimonas* sp. (Betaproteobacteria), *Psychrobacter* sp.  
(Gammaproteobacteria)

Rock inhabiting - *Arthrocatena tenebrio* (Ascomycota)

Salt marsh sediments - *Alcaligenes aquatilis* (Betaproteobacteria)

Thermophilic/thermotolerant - *Bacillus* sp. (Firmicutes)

Tidal flat sediment - *Marinimicrobium* sp. (Gammaproteobacteria)

### **Main Basin (3,606 + 3,621 m)**

Animal gastrointestinal - *Enterobacter* sp. (Gammaproteobacteria), *Escherichia* sp.

(Gammaproteobacteria), rainbow trout intestinal bacterium T1 (Gammaproteobacteria), *Shigella* sp. (Gammaproteobacteria),  
*Candida tropicalis* (Ascomycota)

Beach sediment - *Subaequorebacter tamlense* (Alphaproteobacteria)

Crustacean associated - lobster gut bacterium ABHa3 (phylum undetermined)

Fish associated - *Mycobacterium marinum* (Actinobacteria)

Halophilic/halotolerant - *Staphylococcus* sp. (Firmicutes), *Candida tropicalis*

(Ascomycota), *Millerozyma farinose* (Ascomycota)

Lake - *Rheinheimera* sp. (Gammaproteobacteria)

Lake sediment - *Citrobacter* sp. (Gammaproteobacteria), *Vibrio* sp.

(Gammaproteobacteria)

Methylotrophic - *Ogataea thermomethanolica* (Ascomycota)

Psychrophilic/psychrotolerant - *Sporosarcina globispora* (Firmicutes), *Cladosporium*

*cladosporioides* (Ascomycota)

River - *Sporosarcina globispora* (Firmicutes)

Rock - *Delftia acidovorans* (Betaproteobacteria), *Coniosporium apollinis* (Ascomycota)

Thermophilic/thermotolerant - *Ogataea thermomethanolica* (Ascomycota)

**Table S7. Enumeration of sequence reads and unique sequences.** Each unique sequence represents a separate species or strain.

**GLACIAL (2,149m)**

| <b>TAXON</b>    | <b>READS</b> | <b>UNIQUE SEQs.</b> | <b>CHARACTERS<sup>a</sup></b> |
|-----------------|--------------|---------------------|-------------------------------|
| <b>BACTERIA</b> |              |                     |                               |
| Cyanobacteria   | 97           | 12                  | au, ps                        |

**BASAL (3,501 + 3.520 m)**

| <b>TAXON</b>     | <b>READS</b> | <b>UNIQUE SEQs.</b> | <b>CHARACTERS<sup>a</sup></b>              |
|------------------|--------------|---------------------|--------------------------------------------|
| <b>BACTERIA</b>  |              |                     |                                            |
| Actinobacteria   | 114          | 47                  | aq, al, de, ha, he, ma, nf, no, ps, so, th |
| Bacteroidetes    | 5708         | 86                  | al, an, aq, au, ps, so, th                 |
| Cyanobacteria    | 530          | 2                   | au, ps, th                                 |
| Elusimicrobia    | 3            | 1                   | aq, ma, so                                 |
| Firmicutes       | 61           | 37                  | ae, an, au, ha, ma, ps, th                 |
| Gemmatimonadetes | 1            | 1                   | aq, so                                     |

|                       |      |     |                                                               |
|-----------------------|------|-----|---------------------------------------------------------------|
| Planctomycetes        | 1    | 1   | an, aq, au, ma, nr                                            |
| Proteobacteria        |      |     |                                                               |
| Alphaproteobacteria   | 17   | 11  | aa, al, aq, au, ha, ma, me, nr, ps, sm, so, th                |
| Betaproteobacteria    | 3307 | 129 | ae, aq, au, nf, me, no, nr, ps, am, th                        |
| Deltaproteobacteria   | 30   | 11  | ae, an, aq, au, ha, ma, am, so                                |
| Epsilonproteobacteria | 20   | 5   | aa, ae, an, au, th                                            |
| Gammaproteobacteria   | 50   | 37  | aa, ae, an, aq, au, ha, ic, ma, nf, no, nr, ps,<br>sm, so, th |
| Hydrogeophilales      | 4    | 1   | aq, au, th                                                    |
| Oligoflexia           | 5    | 5   | aq                                                            |
| Spirochaetes          | 3    | 3   | aa, he                                                        |
| <b>ARCHAEA</b>        | 1    | 1   | he, ma, ps, so                                                |
| <b>EUKARYA</b>        |      |     |                                                               |
| Archaeplastida        |      |     |                                                               |
| Chlorophyta           | 330  | 9   | au, ps                                                        |
| Streptophyta          | 93   | 23  | au                                                            |
| Chromalveolata        | 1172 | 21  | aq, au, ps, he                                                |
| Excavata              | 21   | 18  | aq, he                                                        |
| Haptophyta            | 3    | 1   | ma, so                                                        |
| Opisthokonta          |      |     |                                                               |
| Animalia              |      |     |                                                               |
| Arthropoda            | 3    | 3   | aq, he, ps                                                    |
| Fungi                 |      |     |                                                               |
| Ascomycota            | 84   | 21  | aq, he, ps, so                                                |

**WEST REGION OF EMBAYMENT (3540 + 3569 m)**

| <b>TAXON</b>         | <b>READS</b> | <b>UNIQUE SEQs.</b> | <b>CHARACTERS</b>                                             |
|----------------------|--------------|---------------------|---------------------------------------------------------------|
| <b>BACTERIA</b>      |              |                     |                                                               |
| Actinobacteria       | 362          | 40                  | aq, al, de, ha, he, ma, nf, no, ps, so, th                    |
| Cyanobacteria        | 3            | 2                   | au, ps, th                                                    |
| Gemmatimonadetes     | 1            | 1                   | aq, so                                                        |
| Proteobacteria       |              |                     |                                                               |
| Acidithiobacillia    | 2            | 2                   | aa, ae, aq                                                    |
| Alphaproteobacteria  | 4            | 3                   | aa, al, aq, au, ha, ma, me, nr, ps, sm, so, th                |
| Betaproteobacteria   | 1309         | 33                  | ae, aq, au, nf, me, no, nr, ps, am, th                        |
| Deltaproteobacteria  | 5            | 2                   | ae, an, aq, au, ha, ma, am, so                                |
| Gammaproteobacteria. | 122          | 15                  | aa, ae, an, aq, au, ha, ic, ma, nf, no, nr, ps,<br>sm, so, th |
| <b>ARCHAEA</b>       | 2            | 2                   | ha, he, ma, ps, so                                            |
| <b>EUKARYA</b>       |              |                     |                                                               |
| Archaeplastida       |              |                     |                                                               |
| Streptophyta         | 4            | 3                   | au                                                            |
| Excavata             | 1            | 1                   | aq, he                                                        |
| Opisthokonta         |              |                     |                                                               |
| Animalia             |              |                     |                                                               |
| Arthropoda           | 1            | 1                   | aq, he, ps                                                    |
| Fungi                |              |                     |                                                               |
| Ascomycota           | 1            | 1                   | aq, he, ps, so                                                |

**MIDDLE REGION OF EMBAYMENT (3,563 + 3,585 m)**

| <b>TAXON</b>           | <b>READS</b> | <b>UNIQUE SEQs.</b> | <b>CHARACTERS<sup>a</sup></b>                                 |
|------------------------|--------------|---------------------|---------------------------------------------------------------|
| <b>BACTERIA</b>        |              |                     |                                                               |
| Acidobacteria          | nd           | 2                   | ac, aq, he, so                                                |
| Actinobacteria         | nd           | 228                 | aq, al, de, ha, he, ma, nf, no, ps, so, th                    |
| Bacteroidetes/Chlorobi | nd           | 85                  | al, an, aq, au, ps, so, th                                    |
| Chloroflexi            | nd           | 1                   | ae, au, th                                                    |
| Cyanobacteria          | nd           | 228                 | au, ps, th                                                    |
| Deferribacteres        | nd           | 1                   | aa, an, he                                                    |
| Deinococcus/Thermus    | nd           | 5                   | ae, an, he, th                                                |
| Fibrobacteres          | nd           | 1                   | aa, ae, he                                                    |
| Firmicutes             | nd           | 602                 | ae, an, au, ha, ma, ps, th                                    |
| Fusobacteria           | nd           | 10                  | aa, an, he                                                    |
| Planctomycetes         | nd           | 6                   | an, aq, au, ma, nr                                            |
| Proteobacteria         |              |                     |                                                               |
| Alphaproteobacteria    | nd           | 91                  | aa, al, aq, au, ha, ma, me, nr, ps, sm, so, th                |
| Betaproteobacteria     | nd           | 105                 | ae, aq, au, nf, me, no, nr, ps, am, th                        |
| Deltaproteobacteria    | nd           | 10                  | ae, an, aq, au, ha, ma, am, so                                |
| Epsilonproteobacteria  | nd           | 6                   | aa, ae, an, au, th                                            |
| Gammaproteobacteria    | nd           | 254                 | aa, ae, an, aq, au, ha, ic, ma, nf, no, nr, ps,<br>sm, so, th |
| Spirochaetes           | nd           | 8                   | aa, he                                                        |
| Tenericutes            | nd           | 4                   | aa, he                                                        |
| Verrucomicrobia        | nd           | 3                   | aa, ae, aq, he, so                                            |



|                |    |    |                |
|----------------|----|----|----------------|
| <b>ARCHAEA</b> | nd | 2  | he, ma, ps, so |
| <b>EUKARYA</b> |    |    |                |
| Amoebozoa      | nd | 1  | aq, he         |
| Archaeplastida |    |    |                |
| Chlorophyta    | nd | 10 | au, ps         |
| Rhodophyta     | nd | 1  | au, ps         |
| Streptophyta   | nd | 66 | au             |
| Chromalveolata | nd | 12 | aq, au, ps, he |
| Excavata       | nd | 2  | aq, he         |
| Opisthokonta   |    |    |                |
| Animalia       |    |    |                |
| Arthropoda     | nd | 15 | aq, he, ps     |
| Bilateria      | nd | 1  | aq, so         |
| Chordata       | nd | 1  | he             |
| Cnidaria       | nd | 1  | he, ma, ps, so |
| Mollusca       | nd | 1  | he, ma, ps, so |
| Rotifera       | nd | 1  | aq, he, ps     |
| Tardigrada     | nd | 1  | he, ps, th     |
| Fungi          |    |    |                |
| Ascomycota     | nd | 48 | aq, he, ps, so |
| Basidiomycota  | nd | 29 | aq, he, ps, so |
| Mucorales      | nd | 1  | aa, aq, he     |
| Rhizaria       | nd | 1  | aq, he         |

**EAST REGION OF EMBAYMENT (3,385 m)**

| <b>TAXON</b>        | <b>READS</b> | <b>UNIQUE SEQs.</b> | <b>CHARACTERS<sup>a</sup></b>                                 |
|---------------------|--------------|---------------------|---------------------------------------------------------------|
| <b>BACTERIA</b>     |              |                     |                                                               |
| Acidobacteria       | 1            | 1                   | ac, aq, he, so                                                |
| Actinobacteria      | 16,458       | 246                 | aq, al, de, ha, he, ma, nf, no, ps, so, th                    |
| Aquificae           | 1            | 1                   | an, aq, au, th                                                |
| Bacteroidetes       | 65           | 10                  | al, an, aq, au, ps, so, th                                    |
| Cyanobacteria       | 33           | 4                   | au, ps, th                                                    |
| Deinococcus/Thermus | 9            | 3                   | ae, an, he, th                                                |
| Firmicutes          | 610          | 12                  | ae, an, au, ha, ma, ps, th                                    |
| Gemmatimonadetes    | 1            | 1                   | aq, so                                                        |
| Planctomycetes      | 1            | 1                   | an, aq, au, ma, nr                                            |
| Proteobacteria      |              |                     |                                                               |
| Alphaproteobacteria | 1754         | 100                 | aa, al, aq, au, ha, ma, me, nr, ps, sm, so, th                |
| Betaproteobacteria. | 2912         | 84                  | ae, aq, au, nf, me, no, nr, ps, am, th                        |
| Deltaproteobacteria | 8            | 4                   | ae, an, aq, au, ha, ma, am, so                                |
| Gammaproteobacteria | 2035         | 63                  | aa, ae, an, aq, au, ha, ic, ma, nf, no, nr, ps,<br>sm, so, th |
| <b>ARCHAEA</b>      |              |                     |                                                               |
|                     | 2            | 2                   | ha, he, ma, ps, so                                            |
| <b>EUKARYA</b>      |              |                     |                                                               |
| Amoebozoa           | 5            | 5                   | aq, he                                                        |
| Archaeplastida      |              |                     |                                                               |
| Chlorophyta         | 1            | 1                   | au, ps                                                        |
| Streptophyta        | 93           | 47                  | au                                                            |
| Chromalveolata      | 3            | 3                   | aa, aq, au, ps, he                                            |
| Ciliophora          | 2            | 2                   | aq, he                                                        |

|                   |     |    |                |
|-------------------|-----|----|----------------|
| Opisthokonta      |     |    |                |
| Animalia          |     |    |                |
| Arthropoda        | 1   | 1  | aq, he, ps     |
| Choanoflagellates | 1   | 1  | aq, ma, he     |
| Chordata          | 2   | 2  | aq, ma, he, ps |
| Nematoda          | 1   | 1  | aa             |
| Platyhelminthes   | 1   | 1  | aa             |
| Fungi             |     |    |                |
| Ascomycota        | 109 | 22 | aq, he, ps, so |
| Basidiomycota     | 21  | 2  | aq, he, ps, so |

**MAIN BASIN (3,606 + 3,621 m)**

| <b>TAXON</b>           | <b>READS</b> | <b>UNIQUE SEQs.</b> | <b>CHARACTERS<sup>a</sup></b>                  |
|------------------------|--------------|---------------------|------------------------------------------------|
| <b>BACTERIA</b>        |              |                     |                                                |
| Actinobacteria         | nd           | 14                  | aa, aq, he, ma, ps, so                         |
| Bacteroidetes/Chlorobi | nd           | 1                   | ae, al, he, ps                                 |
| Chloroflexi            | nd           | 1                   | ae, au, th                                     |
| Deinococcus/Thermus    | nd           | 1                   | he, th                                         |
| Firmicutes             | nd           | 16                  | aa, al, he, nr, ps, so, th                     |
| Fusobacteria           | nd           | 1                   | aa, ae, he                                     |
| Proteobacteria         |              |                     |                                                |
| Alphaproteobacteria    | nd           | 8                   | aa, ae, ac, aq, au, he, nf, ps, so             |
| Betaproteobacteria     | nd           | 22                  | aa, ae, aq, au, he, ma, nf, no, nr, ps, so, th |
| Gammaproteobacteria    | nd           | 39                  | aa, ae, aq, au, ha, nf, no, nr, pa, ps, so, th |

## EUKARYA

|                |    |    |                        |  |
|----------------|----|----|------------------------|--|
| Archaeplastida |    |    |                        |  |
| Streptophyta   | nd | 2  | au                     |  |
| Opisthokonta   |    |    |                        |  |
| Animalia       |    |    |                        |  |
| Arthropoda     | nd | 5  | aa, aq, he             |  |
| Fungi          |    |    |                        |  |
| Ascomycota     | nd | 13 | aq, he, ma, ps, th, so |  |
| Basidiomycota  | nd | 4  | aq, he, ma, ps         |  |

---

<sup>a</sup> Character abbreviations: aa = animal associated; ac = acidophilic/acidotolerant; ae = aerobic; an = anaerobic; al- = alkaliphilic/alkalitolerant; aq = aquatic; au = autotrophic; de = desiccation-resistant; ha = halophilic/halotolerant; he = heterotrophic; ic = ice/polar associated; ma = marine; me = methane metabolizing; nf = nitrogen fixation; no = ammonia/nitrite/oxidation; nr = nitrite/nitrate reduction; ps = psychrophilic/psychrotolerant; sm = sulfur metabolism; so = soil/sediment inhabiting; th = thermophilic/thermotolerant;

**Table S8. Number of Reads per Gene (gene category).**

**GLACIAL (2,149m)**

Not determined (all uncultured cyanobacteria)

**BASAL (3,501 + 3.520 m)**

| <u>Gene Category</u>  | <u># Occurrences</u> | <u>Gene</u>                                              |
|-----------------------|----------------------|----------------------------------------------------------|
| ABC transporters      | 1                    | ABC transporter                                          |
|                       | 1                    | glycerol-3-phosphate ABC transporter ATP-binding protein |
|                       | 1                    | Maltose/maltodextrin transport ATP-binding protein MalK  |
|                       | 1                    | phosphate ABC transporter                                |
|                       | 1                    | sulfonate ABC transporter ATP-binding protein            |
| ATPase                | 1                    | ATPase AAA-2 domain protein                              |
|                       | 1                    | ATPase P                                                 |
| Amino acid metabolism | 2                    | D-aminoacylase                                           |
|                       | 1                    | Saccharopine dehydrogenase                               |
| Cofactor synthesis    | 2                    | cobalamin biosynthesis protein CobN                      |
|                       | 1                    | cobaltochelatase                                         |

|                       |    |                                                          |
|-----------------------|----|----------------------------------------------------------|
|                       | 1  | molybdopterin biosynthesis protein                       |
| DNA replication       | 2  | ATP-dependent DNA helicase                               |
|                       | 1  | ATP-dependent DNA helicase II UvrD                       |
| Hydrolase             | 1  | acylpyruvate hydrolase                                   |
| Nucleotide metabolism | 1  | adenylate kinase                                         |
| Oxidoreductase        | 1  | betaine-aldehyde dehydrogenase                           |
|                       | 1  | gfo/ldh/MocA family oxidoreductase                       |
|                       | 6  | inositol 2-dehydrogenase                                 |
|                       | 5  | oxidoreductase                                           |
| Sulfur metabolism     | 1  | homoserine O-succinyltransferase                         |
| Sugar metabolism      | 1  | fructosamine kinase                                      |
|                       | 1  | sugar-binding protein                                    |
| Transferase           | 8  | acetyl-CoA acetyltransferase                             |
|                       | 2  | CoA-transferase III family protein                       |
| Translation           | 1  | ribosome biogenesis protein RLP24                        |
| Transport             | 1  | cadmium-transporting ATPase                              |
|                       | 1  | cation-transporting ATPase G                             |
|                       | 1  | Vitamin B12 transport ATP-binding protein BacA           |
| Other                 | 1  | ATP-binding protein                                      |
|                       | 15 | Aim26p (Altered inheritance of mitochondrial protein 26) |
|                       | 1  | dehydrogenase                                            |
|                       | 5  | hypothetical proteins                                    |
|                       | 4  | non-ribosomal peptide synthetase                         |
|                       | 1  | polyphosphate kinase                                     |

|   |                                         |
|---|-----------------------------------------|
| 1 | short-chain dehydrogenase/reductase SDR |
| 1 | TetR family transcriptional regulator   |
| 4 | uncharacterized protein isoforms        |

### WEST REGION OF EMBAYMENT (3540 + 3569 m)

| <u>Gene Category</u>  | <u># Occurrences</u>  | <u>Gene</u>                                              |
|-----------------------|-----------------------|----------------------------------------------------------|
| ABC transporters      | 5                     | ABC transporter                                          |
|                       | 1                     | ABC transporter ATP-binding protein                      |
|                       | 1                     | carbohydrate ABC transporter ATP-binding protein         |
|                       | 2                     | glycerol-3-phosphate ABC transporter ATP-binding protein |
|                       | 1                     | iron ABC transporter                                     |
|                       | 1                     | Maltose/maltodextrin transport ATP-binding protein MalK  |
|                       | 4                     | phosphate ABC transporter                                |
|                       | 1                     | phosphate ABC transporter ATP-binding protein            |
|                       | 1                     | sulfonate ABC transporter ATP-binding protein            |
|                       | Amino acid metabolism | 1                                                        |
| 1                     |                       | betaine-aldehyde dehydrogenase                           |
| 1                     |                       | D-alanine aminotransferase                               |
| 1                     |                       | prephenate dehydratase                                   |
| 1                     |                       | shikimate dehydrogenase                                  |
| Cell structure        | 1                     | ankyrin                                                  |
| Chaperone             | 1                     | co-chaperone YbbN                                        |
| Fatty acid metabolism | 1                     | long-chain-fatty-acid--CoA ligase                        |

|                     |    |                                                          |
|---------------------|----|----------------------------------------------------------|
| Hydrolase           | 2  | formyltetrahydrofolate deformylase                       |
| Nitrogen metabolism | 1  | NarG (nitrogen reductase)                                |
|                     | 2  | nitrate reductase                                        |
|                     | 1  | nitrate reductase A subunit alpha                        |
|                     | 7  | nitrate reductase subunit alpha                          |
|                     | 3  | respiratory nitrate reductase alpha chain                |
|                     | 2  | respiratory nitrate reductase alpha subunit apoprotein   |
| Oxidoreductase      | 1  | FMN-dependent dehydrogenase                              |
| Protease            | 1  | CAAX protease self-immunity                              |
| Sugar metabolism    | 1  | fructosamine kinase                                      |
| Sulfur metabolism   | 1  | homoserine O-succinyltransferase                         |
| Transferase         | 7  | acetyl-CoA acetyltransferase                             |
|                     | 1  | CDP-glycerol--glycerophosphate glycerophosphotransferase |
| Translation         | 13 | translational GTPase TypA                                |
| Transport           | 3  | allantoin permease                                       |
|                     | 1  | hexose transporter-like protein                          |
|                     | 1  | vitamin B12 transport ATP-binding protein BacA           |
|                     | 1  | zinc transporter 10-like isoform X1                      |
| Other               | 1  | amidohydrolase                                           |
|                     | 1  | AMP-dependent synthetase                                 |
|                     | 2  | group 1 glycosyltransferase                              |
|                     | 6  | GTP-binding protein                                      |
|                     | 11 | GTP-binding protein TypA                                 |
|                     | 12 | GTP-binding protein TypA/BipA                            |
|                     | 7  | histone deacetylase 11 isoform                           |



|    |                                             |
|----|---------------------------------------------|
| 12 | hypothetical proteins                       |
| 1  | LVIVD repeat-containing protein             |
| 53 | phage minor tail protein                    |
| 1  | peptide synthetase                          |
| 1  | PRA1 family protein F3-like                 |
| 1  | protein kinase                              |
| 1  | sugar-binding protein                       |
| 1  | phage tail protein                          |
| 3  | thrombospondin-4                            |
| 1  | transcript variant X4 (RNA splicing factor) |
| 1  | tyrosine phosphorylated protein A           |
| 3  | uncharacterized                             |
| 4  | uncharacterized protein isoforms            |

### **MIDDLE REGION OF EMBAYMENT (3,563 + 3,585 m)**

| <b>Category</b>  | <b># Occurrences</b> | <b>Gene</b>                                                    |
|------------------|----------------------|----------------------------------------------------------------|
| ABC transporters | 1                    | ABC transport system ATP-binding protein                       |
|                  | 1                    | antibiotic transport system ATP-binding protein                |
|                  | 1                    | antibiotic transport system permease protein                   |
|                  | 1                    | ATP-binding cassette, subfamily B, bacterial MsbA              |
|                  | 1                    | ATP-binding cassette, subfamily C, bacterial                   |
|                  | 1                    | bacitracin transport system permease protein                   |
|                  | 1                    | bicarbonate transport system ATP-binding protein               |
|                  | 2                    | branched-chain amino acid transport system ATP-binding protein |
|                  | 2                    | cobalt/nickel transport system ATP-binding protein             |
|                  | 1                    | dipeptide transport system permease protein                    |

|                           |   |                                                                  |
|---------------------------|---|------------------------------------------------------------------|
|                           | 1 | dipeptide transport system substrate-binding protein             |
|                           | 1 | glutamine transport system substrate-binding protein             |
|                           | 1 | histidine transport system ATP-binding protein                   |
|                           | 1 | iron complex transport system ATP-binding protein                |
|                           | 2 | iron complex transport system permease protein                   |
|                           | 1 | iron(III) transport system ATP-binding protein                   |
|                           | 1 | lipoprotein-releasing system permease protein                    |
|                           | 1 | lipopolysaccharide transport system permease protein             |
|                           | 1 | manganese/zinc/iron transport system ATP-binding protein         |
|                           | 1 | multiple sugar transport system permease protein                 |
|                           | 1 | peptide/nickel transport system substrate-binding protein        |
|                           | 1 | phosphonate transport system ATP-binding protein                 |
|                           | 1 | polar amino acid ABC transporter inner membrane subunit          |
|                           | 1 | putrescine transport system substrate-binding protein            |
|                           | 1 | ribose transport system ATP-binding protein                      |
|                           | 1 | ribose transport system permease protein                         |
|                           | 2 | sorbitol/mannitol transport system permease protein              |
|                           | 2 | spermidine/putrescine transport system permease protein          |
|                           | 1 | spermidine/putrescine transport system substrate-binding protein |
|                           | 1 | sulfate transport system ATP-binding protein                     |
|                           | 1 | sulfate transport system permease protein                        |
|                           | 1 | urea transport system substrate-binding protein                  |
| ATPase                    | 1 | arsenite-transporting ATPase                                     |
|                           | 2 | Cu <sup>2+</sup> -exporting ATPase                               |
| Aminoacyl tRNA synthetase | 1 | arginyl-tRNA synthetase                                          |
|                           | 1 | aspartyl-tRNA synthetase                                         |
|                           | 1 | choline dehydrogenase                                            |
|                           | 1 | cysteinyl-tRNA synthetase                                        |
|                           | 1 | glycyl-tRNA synthetase beta chain                                |
|                           | 3 | histidyl-tRNA synthetase                                         |
|                           | 2 | lysyl-tRNA synthetase, class I                                   |
|                           | 1 | lysyl-tRNA synthetase, class II                                  |

|                       |   |                                                  |
|-----------------------|---|--------------------------------------------------|
|                       | 1 | methionyl-tRNA synthetase                        |
|                       | 2 | phenylalanyl-tRNA synthetase alpha chain         |
|                       | 2 | phenylalanyl-tRNA synthetase beta chain          |
|                       | 1 | prolyl-tRNA synthetase                           |
|                       | 1 | tyrosyl-tRNA synthetase                          |
|                       | 1 | valyl-tRNA synthetase                            |
| Amino acid metabolism | 1 | acetolactate synthase I/II/III large subunit     |
|                       | 1 | acetylornithine deacetylase                      |
|                       | 1 | agmatine deiminase                               |
|                       | 2 | alanine dehydrogenase                            |
|                       | 1 | alanine-glyoxylate transaminase                  |
|                       | 1 | alanine racemase, N-terminal                     |
|                       | 1 | amino-acid N-acetyltransferase                   |
|                       | 1 | argininosuccinate lyase                          |
|                       | 1 | asparagine synthase                              |
|                       | 1 | aspartate aminotransferase                       |
|                       | 1 | aspartate carbamoyltransferase catalytic subunit |
|                       | 1 | aspartate 4-decarboxylase                        |
|                       | 1 | aspartate-semialdehyde dehydrogenase             |
|                       | 1 | ATP phosphoribosyltransferase                    |
|                       | 1 | branched-chain amino acid aminotransferase       |
|                       | 1 | choline dehydrogenase                            |
|                       | 1 | cyclase                                          |
|                       | 2 | cysteine synthase A                              |
|                       | 1 | D-alanine-D-alanine ligase                       |
|                       | 1 | D-cysteine desulfhydrase                         |
|                       | 1 | 3-dehydroquinate synthase                        |
|                       | 1 | endo-1,4-beta-xylanase                           |
|                       | 1 | glutaminase                                      |
|                       | 2 | glutamine amidotransferase                       |
|                       | 2 | glutamine synthetase                             |
|                       | 1 | glutamate racemase                               |
|                       | 4 | glycine dehydrogenase                            |

|                      |   |                                                                      |
|----------------------|---|----------------------------------------------------------------------|
|                      | 1 | hippurate hydrolase                                                  |
|                      | 1 | histidinol-phosphate aminotransferase                                |
|                      | 1 | histidinol dehydrogenase                                             |
|                      | 1 | homoserine kinase                                                    |
|                      | 2 | 3-hydroxyisobutyrate dehydrogenase                                   |
|                      | 1 | 3-isopropylmalate/(R)-2-methylmalate dehydratase large subunit       |
|                      | 3 | ketol-acid reductoisomerase                                          |
|                      | 3 | L-aspartate oxidase                                                  |
|                      | 1 | methylmalonate-semialdehyde dehydrogenase                            |
|                      | 1 | monoamine oxidase                                                    |
|                      | 1 | ornithine carbamoyltransferase                                       |
|                      | 1 | oxaloacetate decarboxylase, beta subunit                             |
|                      | 2 | pantoate--beta-alanine ligase                                        |
|                      | 1 | peptidylprolyl isomerase                                             |
|                      | 1 | 3-(3-hydroxy-phenyl)propionate hydroxylase                           |
|                      | 1 | D-3-phosphoglycerate dehydrogenase                                   |
|                      | 1 | prephenate dehydratase                                               |
|                      | 2 | proline dehydrogenase /delta 1-pyrroline-5-carboxylate dehydrogenase |
|                      | 1 | proline iminopeptidase                                               |
|                      | 1 | RNA polymerase nonessential primary-like sigma factor                |
|                      | 1 | S-adenosylhomocysteine/5'-methylthioadenosine nucleosidase           |
|                      | 1 | sarcosine oxidase, subunit alpha                                     |
|                      | 1 | shikimate dehydrogenase                                              |
|                      | 1 | 2,3,4,5-tetrahydropyridine-2-carboxylate N-succinyltransferase       |
|                      | 1 | tryptophan synthase beta chain                                       |
| Butanoate metabolism | 2 | acetoacetyl-CoA synthetase                                           |
|                      | 1 | formate C-acetyltransferase                                          |
| Calcium signaling    | 1 | Ca <sup>2+</sup> -transporting ATPase                                |
|                      | 1 | phosphorylase kinase alpha/beta subunit                              |
| Carbon fixation      | 1 | 3-hydroxyacyl-CoA dehydrogenase                                      |

|                       |                 |                                                                        |
|-----------------------|-----------------|------------------------------------------------------------------------|
| Cell cycle            | 1               | ATP-dependent Clp protease ATP-binding subunit ClpX                    |
|                       | 1               | ATP-dependent Clp protease, protease subunit                           |
|                       | 1               | ATP-dependent Lon protease                                             |
|                       | 1               | glucose repression regulatory protein TUP1                             |
|                       | 1               | regulator of sigma E protease                                          |
| Cofactor synthesis    | 1               | 4-hydroxythreonine-4-phosphate dehydrogenase                           |
|                       | 1               | molybdenum cofactor biosynthesis protein                               |
|                       | 1               | thiamine biosynthesis protein ThiC                                     |
|                       | 1               | thiamine-phosphate pyrophosphorylase                                   |
| DNA Recombination     | 1               | ATP-dependent DNA helicase RecG                                        |
|                       | 1               | deoxyribodipyrimidine photo-lyase                                      |
|                       | 1               | holliday junction DNA helicase RuvB                                    |
|                       | 1               | methylated-DNA-[protein]-cysteine S-methyltransferase                  |
|                       | 2               | primosomal protein N' (replication factor Y) (superfamily II helicase) |
|                       | 1               | recombination protein RecA                                             |
| DNA repair            | 1               | DNA helicase II / ATP-dependent DNA helicase PcrA                      |
|                       | 1               | DNA mismatch repair protein MutL                                       |
|                       | 1               | DNA polymerase I                                                       |
|                       | 1               | DNA polymerase V                                                       |
|                       | 1               | excinuclease ABC subunit C                                             |
|                       | 1               | excinuclease ABC subunit B                                             |
|                       | 1               | exodeoxyribonuclease III                                               |
|                       | 1               | exodeoxyribonuclease VII large subunit                                 |
|                       | 1               | transcription-repair coupling factor (superfamily II helicase)         |
|                       | DNA replication | 1                                                                      |
| 1                     |                 | DNA gyrase subunit A                                                   |
| 3                     |                 | replicative DNA helicase                                               |
| 1                     |                 | single-strand DNA-binding protein                                      |
| Fatty acid metabolism | 1               | acyl-CoA dehydrogenase                                                 |

|                            |   |                                                                          |
|----------------------------|---|--------------------------------------------------------------------------|
|                            | 2 | enoyl-[acyl carrier protein] reductase I                                 |
|                            | 1 | enoyl-[acyl-carrier protein] reductase II                                |
|                            | 1 | enoyl-CoA hydratase                                                      |
|                            | 2 | fatty-acyl-CoA synthase                                                  |
|                            | 4 | 3-hydroxydecanoyl-[acyl-carrier-protein] dehydratase                     |
|                            | 1 | 3R-hydroxymyristoyl ACP dehydrase                                        |
|                            | 3 | long-chain acyl-CoA synthetase                                           |
|                            | 1 | omega-6 fatty acid desaturase (delta-12 desaturase)                      |
|                            | 1 | 3-oxoacyl-[acyl-carrier-protein] synthase III                            |
| Glutathione metabolism     | 3 | glutathione-independent formaldehyde dehydrogenase                       |
| Glycolysis-Gluconeogenesis | 2 | acetyl-CoA synthetase                                                    |
|                            | 3 | aldehyde dehydrogenase (NAD+)                                            |
|                            | 1 | enolase                                                                  |
|                            | 1 | glucose-6-phosphate isomerase                                            |
|                            | 6 | glyceraldehyde 3-phosphate dehydrogenase                                 |
|                            | 1 | phosphoenolpyruvate carboxykinase (ATP)                                  |
|                            | 2 | pyruvate dehydrogenase E1 component                                      |
|                            | 1 | pyruvate dehydrogenase E2 component (dihydrolipoamide acetyltransferase) |
| Hydrolase                  | 1 | haloalkane dehalogenase                                                  |
| Nitrogen metabolism        | 1 | asparagine synthase (glutamine-hydrolysing)                              |
|                            | 1 | ferredoxin-nitrate reductase                                             |
|                            | 1 | FMN-dependent NADH-azoreductase                                          |
|                            | 2 | nitrate reductase 1, alpha subunit                                       |
|                            | 2 | sulfonate/nitrate/taurine transport system permease protein              |
|                            | 1 | ubiquinol-cytochrome c reductase cytochrome b subunit                    |
| Nucleotide metabolism      | 2 | adenylate cyclase                                                        |
|                            | 1 | adenylosuccinate synthase                                                |
|                            | 1 | altronate hydrolase                                                      |
|                            | 1 | amidophosphoribosyltransferase                                           |

|   |                                                                               |
|---|-------------------------------------------------------------------------------|
| 1 | exopolyphosphatase / guanosine-5'-triphosphate,3'-diphosphate pyrophosphatase |
| 1 | carbamoyl-phosphate synthase large subunit                                    |
| 1 | 2',3'-cyclic-nucleotide 2'-phosphodiesterase                                  |
| 1 | cytosine deaminase                                                            |
| 2 | dCTP deaminase                                                                |
| 1 | CTP synthase                                                                  |
| 1 | 1-deoxy-D-xylulose-5-phosphate synthase                                       |
| 1 | dihydroorotate dehydrogenase (fumarate)                                       |
| 1 | DNA (cytosine-5-)-methyltransferase                                           |
| 1 | DNA-directed RNA polymerase subunit beta                                      |
| 1 | DNA polymerase III subunit delta                                              |
| 1 | DNA polymerase III subunit epsilon                                            |
| 1 | DNA polymerase III subunit gamma/tau                                          |
| 1 | galactokinase                                                                 |
| 1 | glucose-1-phosphate adenyltransferase                                         |
| 2 | GMP synthase (glutamine-hydrolysing)                                          |
| 1 | GTP pyrophosphokinase                                                         |
| 1 | guanosine-3',5'-bis(diphosphate) 3'-pyrophosphohydrolase                      |
| 1 | IMP dehydrogenase                                                             |
| 1 | mannose-1-phosphate guanylyltransferase                                       |
| 1 | N-acetylglucosamine-6-phosphate deacetylase                                   |
| 1 | N-acetylneuraminate synthase                                                  |
| 1 | nucleoside-triphosphate pyrophosphatase                                       |
| 1 | phosphoribosylamine--glycine ligase                                           |
| 1 | phosphoribosylformylglycinamide cyclo-ligase                                  |
| 1 | phosphoribosylformylglycinamide synthase                                      |
| 1 | polyribonucleotide nucleotidyltransferase                                     |
| 1 | pyrimidine operon attenuation protein / uracil phosphoribosyltransferase      |
| 1 | pyrimidine-nucleoside phosphorylase                                           |
| 1 | ribonucleoside-diphosphate reductase alpha chain                              |
| 1 | RNA-directed DNA polymerase                                                   |
| 1 | thymidine kinase                                                              |
| 1 | thymidylate synthase                                                          |
| 1 | UDP-galactopyranose mutase                                                    |

|                           |   |                                                           |
|---------------------------|---|-----------------------------------------------------------|
|                           | 3 | UDPglucose 6-dehydrogenase                                |
|                           | 1 | UDP glucose--hexose-1-phosphate uridylyltransferase       |
|                           | 1 | UDP-N-acetylmuramoylalanine--D-glutamate ligase           |
|                           | 1 | UDP-N-acetylmuramate dehydrogenase                        |
|                           | 1 | UDP-N-acetylglucosamine 2-epimerase                       |
|                           | 1 | UDP-N-acetylglucosamine pyrophosphorylase                 |
|                           | 1 | ureidoglycolate dehydrogenase                             |
|                           | 1 | ureidoglycine aminohydrolase                              |
|                           | 1 | xylulokinase                                              |
| Oxidative phosphorylation | 2 | cytochrome bd-I oxidase subunit I                         |
|                           | 1 | cytochrome o ubiquinol oxidase subunit I                  |
|                           | 1 | F-type H <sup>+</sup> -transporting ATPase subunit alpha  |
|                           | 1 | F-type H <sup>+</sup> -transporting ATPase subunit gamma  |
|                           | 1 | glycerol-3-phosphate dehydrogenase                        |
|                           | 1 | H <sup>+</sup> -transporting ATPase                       |
|                           | 1 | inorganic pyrophosphatase                                 |
|                           | 7 | NADH dehydrogenase                                        |
|                           | 1 | succinate dehydrogenase iron-sulfur protein               |
|                           | 1 | ubiquinol-cytochrome c reductase cytochrome b subunit     |
| Oxidoreductase            | 1 | chloride peroxidase                                       |
|                           | 1 | cytochrome c peroxidase                                   |
|                           | 1 | glycerol dehydrogenase                                    |
|                           | 1 | molybdopterin oxidoreductase, iron-sulfur binding subunit |
|                           | 1 | NADH oxidase                                              |
| Pentose phosphate pathway | 1 | 2-dehydro-3-deoxygluconokinase                            |
|                           | 1 | ribose-phosphate pyrophosphokinase                        |
|                           | 1 | transaldolase                                             |
| Peptidase                 | 1 | methionyl aminopeptidase                                  |
|                           | 1 | tripeptide aminopeptidase                                 |



|                   |                                   |                                                                        |
|-------------------|-----------------------------------|------------------------------------------------------------------------|
| Photosynthesis    | 1                                 | apocytochrome f                                                        |
|                   | 1                                 | coproporphyrinogen III oxidase                                         |
|                   | 1                                 | glutamate-1-semialdehyde 2,1-aminomutase                               |
|                   | 1                                 | heme oxygenase                                                         |
|                   | 1                                 | light-independent protochlorophyllide reductase subunit B              |
|                   | 1                                 | light-independent protochlorophyllide reductase subunit L              |
|                   | 1                                 | magnesium chelatase subunit H                                          |
|                   | 1                                 | nicotinate-nucleotide--dimethylbenzimidazole phosphoribosyltransferase |
|                   | 1                                 | phosphoribulokinase                                                    |
|                   | 1                                 | photosystem I P700 chlorophyll a apoprotein A1                         |
|                   | 1                                 | photosystem I P700 chlorophyll a apoprotein A2                         |
|                   | 1                                 | photosystem I subunit XI                                               |
|                   | 1                                 | photosystem II CP43 chlorophyll apoprotein                             |
|                   | 1                                 | photosystem II P680 reaction center D1 protein                         |
|                   | 1                                 | phycocyanin beta chain                                                 |
|                   | 1                                 | precorrin-8X methylmutase                                              |
|                   | 2                                 | pyruvate-flavodoxin oxidoreductase                                     |
| 1                 | S-layer domain-containing protein |                                                                        |
| 1                 | uroporphyrinogen decarboxylase    |                                                                        |
| RNA metabolism    | 4                                 | ATP-dependent RNA helicase DeaD                                        |
|                   | 1                                 | (di)nucleoside polyphosphate hydrolase                                 |
|                   | 1                                 | exoribonuclease II                                                     |
| Secretion system  | 1                                 | preprotein translocase subunit SecE                                    |
|                   | 1                                 | preprotein translocase subunit SecY                                    |
|                   | 1                                 | type IV secretion system protein VirB4                                 |
|                   | 1                                 | type IV secretion system protein VirB9                                 |
| Sulfur metabolism | 1                                 | sulfite reductase (NADPH) hemoprotein beta-component                   |
|                   | 1                                 | tRNA-specific 2-thiouridylase                                          |
| TCA cycle         | 1                                 | fumarate hydratase, class I                                            |
|                   | 2                                 | isocitrate dehydrogenase                                               |

|             |   |                                                                                |
|-------------|---|--------------------------------------------------------------------------------|
|             | 2 | 2-oxoglutarate dehydrogenase (dihydrolipoamide succinyltransferase)            |
| Transferase | 1 | aminoglycoside 3'-phosphotransferase                                           |
|             | 1 | glutamate-ammonia-ligase adenylyltransferase                                   |
|             | 1 | lipid-A-disaccharide synthase                                                  |
|             | 1 | leucyl/phenylalanyl-tRNA--protein transferase                                  |
|             | 1 | ribosomal-protein-alanine N-acetyltransferase                                  |
|             | 1 | serine/threonine-protein kinase HipA                                           |
|             | 1 | UDP-N-acetylglucosamine acyltransferase                                        |
| Translation | 1 | elongation factor 2                                                            |
|             | 2 | elongation factor Tu                                                           |
| Transport   | 1 | elongation factor 1-alpha                                                      |
|             | 1 | LPS-assembly protein                                                           |
|             | 1 | mechanosensitive ion channel                                                   |
|             | 1 | MFS transporter, FSR family, fosmidomycin resistance protein                   |
|             | 1 | preprotein translocase subunit SecY                                            |
| Other       | 1 | alpha-L-fucosidase                                                             |
|             | 1 | alpha-galactosidase                                                            |
|             | 1 | alpha-glucuronidase                                                            |
|             | 1 | 4-aminobutyrate aminotransferase / (S)-3-amino-2-methylpropionate transaminase |
|             | 1 | anthraniloyl-CoA monooxygenase                                                 |
|             | 1 | arylsulfatase A                                                                |
|             | 1 | arachidonate 5-lipoxygenase                                                    |
|             | 1 | beta-fructofuranosidase                                                        |
|             | 1 | beta-galactosidase                                                             |
|             | 1 | 1,3-beta-glucan synthase                                                       |
|             | 1 | beta-glucosidase                                                               |
|             | 1 | beta-lactamase                                                                 |
|             | 1 | catalase                                                                       |
|             | 1 | cell division protein FtsI (penicillin-binding protein 3)                      |

1 chromosomal replication initiator protein  
1 CoA-binding protein  
1 Cu(I)/Ag(I) efflux system membrane protein CusA  
1 Cu(I)/Ag(I) efflux system membrane protein CusB  
1 Cyan7425\_1370 Signal transduction histidine kinase  
1 dephospho-CoA kinase  
1 dolichol-phosphate mannosyltransferase  
1 4-diphosphocytidyl-2-C-methyl-D-erythritol kinase  
1 endonuclease G, mitochondrial  
1 Fe-S cluster assembly protein  
2 formate dehydrogenase, alpha subunit  
1 formate dehydrogenase, beta subunit  
1 S-formylglutathione hydrolase  
1 glutamate--cysteine ligase  
1 glycolate oxidase FAD binding subunit  
2 gamma-glutamyltranspeptidase  
1 hemolysin D  
1 heptaprenyl diphosphate synthase  
1 3-hydroxybutyryl-CoA dehydratase  
1 4-hydroxy-3-methylbut-2-enyl diphosphate reductase  
1 glutathione S-transferase  
1 lactoylglutathione lyase  
1 L-ascorbate 6-phosphate lactonase  
1 L-ribulose-5-phosphate 3-epimerase  
1 leucyl aminopeptidase  
1 lipid A biosynthesis lauroyl acyltransferase  
1 malate dehydrogenase (oxaloacetate-decarboxylating)  
1 maltose alpha-D-glucosyltransferase  
1 membrane dipeptidase  
1 methylenetetrahydrofolate dehydrogenase(NAD+) / 5,10-  
methenyltetrahydrofolate cyclohydrolase  
1 NAD+ synthase (glutamine-hydrolysing)  
1 oligosaccharyltransferase complex subunit beta  
1 3-oxoadipyl-CoA thiolase

|    |                                                                              |
|----|------------------------------------------------------------------------------|
| 2  | penicillin-binding protein                                                   |
| 1  | peptidyl-dipeptidase Dcp                                                     |
| 1  | phospholipase A-2-activating protein                                         |
| 1  | phosphatidate cytidyltransferase                                             |
| 1  | phosphopantothenoylcysteine decarboxylase                                    |
| 1  | [protein-PII] uridylyltransferase                                            |
| 1  | propionyl-CoA carboxylase beta chain                                         |
| 1  | protein phosphatase                                                          |
| 1  | PTS system, mannose-specific IIA component                                   |
| 2  | PTS system, mannose-specific IIB component                                   |
| 1  | pullulanase                                                                  |
| 1  | pyruvate oxidase                                                             |
| 1  | pyruvate, water dikinase                                                     |
| 1  | repressor LexA                                                               |
| 1  | signal peptidase II                                                          |
| 1  | starch synthase                                                              |
| 1  | sucrose phosphorylase                                                        |
| 1  | 2-succinyl-5-enolpyruvyl-6-hydroxy-3-cyclohexene-1-carboxylate synthase      |
| 1  | superoxide dismutase, Fe-Mn family                                           |
| 1  | tartronate-semialdehyde synthase                                             |
| 1  | dTDP-glucose 4,6-dehydratase                                                 |
| 2  | dTDP-4-dehydrorhamnose 3,5-epimerase                                         |
| 1  | trans-aconitate 2-methyltransferase                                          |
| 1` | transcription termination factor Rho                                         |
| 2  | transposase                                                                  |
| 1  | tRNA dimethylallyltransferase                                                |
| 1  | two-component system, cell cycle response regulator                          |
| 1  | two-component system, chemotaxis family, CheB/CheR fusion protein            |
| 1  | two-component system, chemotaxis family, sensor kinase CheA                  |
| 1  | two-component system, NarL family, sensor histidine kinase DesK              |
| 1  | two-component system, NtrC family, sensor histidine kinase HydH              |
| 1  | two-component system, OmpR family, heavy metal sensor histidine kinase CusS  |
| 1  | two-component system, OmpR family, osmolarity sensor histidine kinase EnvZ   |
| 1  | two-component system, OmpR family, phosphate regulon sensor histidine kinase |

PhoR

|   |                                                                                                                     |
|---|---------------------------------------------------------------------------------------------------------------------|
| 1 | two-component system, OmpR family, response regulator VicR                                                          |
| 1 | type I restriction enzyme, R subunit                                                                                |
| 1 | 3D-(3,5/4)-trihydroxycyclohexane-1,2-dione hydrolase                                                                |
| 1 | ubiquinone/menaquinone biosynthesis methyltransferase                                                               |
| 1 | UDP-3-O-[3-hydroxymyristoyl] N-acetylglucosamine deacetylase                                                        |
| 1 | UDP-N-acetylglucosamine--N-acetylmuramyl-(pentapeptide) pyrophosphoryl-undecaprenol N-acetylglucosamine transferase |
| 2 | UDP-N-acetylmuramoylalanyl-D-glutamyl-2,6-diaminopimelate--D-alanyl-D-alanine ligase                                |
| 2 | undecaprenyl-diphosphate synthase                                                                                   |
| 1 | zinc metalloprotease                                                                                                |

**EAST REGION OF EMBAYMENT (3,385 m)**

| <b>Category</b>       | <b># Occurrences</b> | <b>Gene</b>                                     |
|-----------------------|----------------------|-------------------------------------------------|
| ABC transporters      | 1                    | ABC transporter                                 |
|                       | 1                    | ABC-type antimicrobial peptide transport system |
| ATPase                | 1                    | AtpE                                            |
|                       | 11                   | ATP synthase CF1 epsilon subunit                |
|                       | 1                    | ClpV1 family T6SS ATPase                        |
| Amino acid metabolism | 5                    | cobalamin synthesis protein                     |
|                       | 3                    | D-aminoacylase                                  |
|                       | 14                   | gamma-glutamyl phosphate reductase              |
|                       | 11                   | glutamate-5-semialdehyde dehydrogenase          |

|                            |    |                                                                      |
|----------------------------|----|----------------------------------------------------------------------|
|                            | 2  | glycine decarboxylase                                                |
|                            | 26 | imidazole glycerol phosphate synthase                                |
|                            | 1  | methionine synthase (B12-independent)                                |
|                            | 2  | 5-methyltetrahydropteroyltriglutamate-homocysteine methyltransferase |
|                            | 1  | phosphoserine aminotransferase                                       |
|                            | 1  | phosphoserine transaminase                                           |
|                            | 1  | poly(enriched lactate-co-3-hydroxybutyrate) depolymerase             |
|                            | 1  | prephenate dehydratase                                               |
| Chaperone                  | 1  | co-chaperone YbbN                                                    |
|                            | 2  | metal chaperone                                                      |
| Cofactor synthesis         | 16 | cobalamin biosynthesis protein                                       |
|                            | 2  | cobW/HypB/UreG                                                       |
|                            | 1  | 2-succinylbenzoate--CoA ligase                                       |
| DNA repair                 | 3  | excinuclease ABC                                                     |
|                            | 8  | excinuclease ABC subunit A                                           |
|                            | 2  | excinuclease ABC subunit UvrA                                        |
| DNA replication            | 7  | ATP-dependent helicase                                               |
| Fatty acid metabolism      | 5  | acetyl/propionyl-CoA carboxylase subunit alpha                       |
|                            | 1  | acetyl-CoA carboxylase                                               |
|                            | 1  | acetyl-CoA carboxylase biotin carboxylase subunit                    |
|                            | 1  | acyl-CoA synthetase                                                  |
|                            | 4  | acyl-CoA synthetase (AMP-forming)/AMP-acid ligase II                 |
|                            | 7  | AMP-dependent synthetase                                             |
|                            | 1  | Fatty-acid-CoA ligase FadD7                                          |
|                            | 1  | fatty-acyl-CoA synthase                                              |
|                            | 2  | long-chain fatty acid--CoA ligase                                    |
| Glycolysis-Gluconeogenesis | 1  | 3-phosphoglycerate kinase                                            |
|                            | 62 | phosphoglycerate kinase                                              |

|                               |                          |                                                                |
|-------------------------------|--------------------------|----------------------------------------------------------------|
| Nitrogen metabolism           | 1                        | nitrile hydratase activator                                    |
| Nucleotide metabolism         | 2                        | carbamoyl-phosphate synthase L chain ATP-binding               |
|                               | 1                        | GTP pyrophosphokinase                                          |
|                               | 19                       | thymidylate synthase protein                                   |
| Oxidoreductase                | 3                        | FAD dependent oxidoreductase                                   |
|                               | 2                        | Glucose-methanol-choline (GMC) oxidoreductase:NAD binding site |
|                               | 2                        | GMC family oxidoreductase                                      |
|                               | 2                        | 2-keto-gluconate dehydrogenase                                 |
| Ribonuclease                  | 1                        | NYN domain                                                     |
|                               | 1                        | polyribonucleotide nucleotidyltransferase                      |
| Sugar/carbohydrate metabolism | 1                        | beta-glucosidase                                               |
|                               | 1                        | fructose-1                                                     |
|                               | 1                        | fructosamine kinase                                            |
|                               | 1                        | fructose dehydrogenase large subunit                           |
|                               | 2                        | glucoamylase                                                   |
|                               | 1                        | glycogen branching enzyme                                      |
|                               | 2                        | group 1 glycosyltransferase                                    |
| Sulfur metabolism             | 1                        | sulfatase                                                      |
| TCA cycle                     | 5                        | propionyl-CoA carboxylase                                      |
| Translation                   | 1                        | 50S ribosomal protein L21                                      |
|                               | 31                       | elongation factor 4                                            |
|                               | 1                        | translation elongation factor LepA                             |
|                               | 8                        | translational GTPase TypA                                      |
|                               | 3                        | GTP-binding elongation factor                                  |
|                               | 21                       | GTP-binding protein LepA                                       |
| 28                            | GTP-binding protein TypA |                                                                |

|           |    |                                                     |
|-----------|----|-----------------------------------------------------|
|           | 1  | Translational regulator                             |
| Transport | 7  | acetyl-CoA acetyltransferase                        |
|           | 1  | cadmium transporter                                 |
|           | 6  | cation transporter                                  |
|           | 2  | cobalt-zinc-cadmium resistance protein CzcA         |
|           | 7  | CusA/CzcA family heavy metal efflux RND transporter |
|           | 1  | efflux transporter periplasmic adaptor subunit      |
|           | 1  | heavy metal efflux pump                             |
|           | 1  | hexose transporter-like protein                     |
|           | 4  | preprotein translocase subunit SecF                 |
|           | 2  | zinc transporter 10-like isoforma                   |
| Other     | 1  | ATP/GTP-binding protein                             |
|           | 11 | ATP-dependent RNA helicases HrpA/HrpB               |
|           | 1  | Bifunctional (p)ppGpp synthase/hydrolase relA       |
|           | 1  | biotin carboxyl carrier protein                     |
|           | 1  | COBW domain-containing protein                      |
|           | 1  | glutathione S-transferase Mu 2                      |
|           | 9  | glycine dehydrogenase                               |
|           | 1  | GTPase                                              |
|           | 1  | GTP-binding protein                                 |
|           | 3  | GTP pyrophosphokinase                               |
|           | 10 | lysine-specific demethylase PHF2                    |
|           | 6  | 4-hydroxytetrahydrobiopterin dehydratase            |
|           | 35 | hypothetical protein                                |
|           | 1  | keratinocyte proline-rich protein                   |
|           | 1  | LVIVD repeat-containing protein                     |
|           | 1  | modular polyketide synthase                         |
|           | 1  | N-lysine methyltransferase SETD8-A-like             |
|           | 1  | O-succinylbenzoate-CoA ligase                       |
|           | 4  | PHD finger protein 2                                |
|           | 1  | PRA1 family protein F3-like                         |
|           | 1  | RNA helicase                                        |



|   |                                                      |
|---|------------------------------------------------------|
| 1 | sorbose dehydrogenase                                |
| 1 | sugar-binding protein                                |
| 1 | TetR family transcriptional regulator                |
| 1 | transmembrane protein 151B                           |
| 1 | type IV secretory pathway                            |
| 1 | type VI secretion ATPase                             |
| 2 | UDP-glucose 6-dehydrogenase UdgA                     |
| 1 | UDP-glucose glycoprotein glucosyltransferase 1       |
| 1 | UDP-glucose/GDP-mannose dehydrogenase family protein |
| 1 | YihY family inner membrane domain protein            |

### **MAIN BASIN (3,606 + 3,621 m)**

| <b>Category</b>           | <b># Occurrences</b> | <b>Gene</b>                           |
|---------------------------|----------------------|---------------------------------------|
| Amino acid metabolism     | 1                    | aspartate kinase                      |
|                           | 1                    | LysR family transcriptional regulator |
|                           | 1                    | glutamate--cysteine ligase            |
|                           | 1                    | glutamine amidotransferase            |
| Citrate cycle             | 1                    | succinyl-CoA synthetase beta subunit  |
| DNase                     | 1                    | type I restriction enzyme, S subunit  |
| DNA repair                | 1                    | excinuclease ABC subunit B            |
| Nucleotide metabolism     | 1                    | cytosine deaminase                    |
|                           | 1                    | UDP-N-acetylglucosamine 2-epimerase   |
| Oxidative phosphorylation | 2                    | cytochrome c oxidase subunit II       |

|                           |   |                                                  |
|---------------------------|---|--------------------------------------------------|
|                           | 1 | cytochrome c oxidase assembly protein subunit 15 |
|                           | 1 | cytochrome o ubiquinol oxidase subunit I         |
| Pentose phosphate pathway | 1 | transketolase                                    |
| Protease                  | 1 | ATP-dependent Clp protease adaptor protein ClpS  |
| Transferase               | 1 | colanic acid biosynthesis acetyltransferase      |
|                           | 1 | phosphotransferase system, enzyme I, PtsI        |
| Translation               | 1 | GTPase (translation)                             |
| Transport                 | 1 | Cu <sup>2+</sup> -exporting ATPase               |
|                           | 1 | multidrug efflux transporter MdtA                |
| Transposase               | 1 | Transposase                                      |
| Other                     | 1 | chitin-binding protein                           |
